# Supplementary material for: Transition-metal free 2-arylbenzoxazole formation from aryl amides and cyclohexanones
Source: Royal Society of Chemistry journal article supplement (doi:10.1039/c4gc01572j), 2014-08-28

## Supporting Information for

### Transition-Metal Free 2-Arylbenzoxazole Formation from Aryl Amides and Cyclohexanones

Xiangxiang Cao,<sup>a</sup> Xiufang Cheng,<sup>a</sup> Yang Bai,<sup>a</sup> Saiwen Liu,<sup>a</sup> and Guo-Jun Deng<sup>a,b\*</sup>

<sup>a</sup> Key Laboratory of Environmentally Friendly Chemistry and Application of Ministry of Education, College of Chemistry, Xiangtan University, Xiangtan 411105, China; Fax: (+86)-731-58292251; e-mail: gjdeng@xtu.edu.cn

<sup>b</sup> Key Laboratory of Molecular Recognition and Function, Institute of Chemistry, Chinese Academy of Sciences, Beijing 100080, China.

#### Table of Contents

|                                                                    |              |
|--------------------------------------------------------------------|--------------|
| <b>1. General information</b>                                      | <b>2</b>     |
| <b>2. General experimental procedure</b>                           | <b>2</b>     |
| <b>3. Characterization data of products</b>                        | <b>2-10</b>  |
| <b>4. References</b>                                               | <b>11</b>    |
| <b>5. <sup>1</sup>H and <sup>13</sup>C NMR spectra of products</b> | <b>12-30</b> |
| <b>6. HRMS spectra of new products</b>                             | <b>31-33</b> |

### General information:

All experiments were carried out under an atmosphere of oxygen. Flash column chromatography was performed over silica gel 40-60  $\mu\text{m}$ .  $^1\text{H}$  NMR and  $^{13}\text{C}$  NMR spectra were recorded on Bruker-AV (400 and 100 MHz, respectively) instrument internally referenced to  $\text{SiMe}_4$  or chloroform signals. MS analyses were performed on an Agilent 5975 GC-MS instrument (EI). High-resolution mass spectra were recorded at Institute of Chemistry, Chinese Academy of Sciences. The structures of known compounds were further corroborated by comparing their NMR data and MS data with those of literature. The structures of unknown compounds were further characterized by HRMS. Reagents were used as received from commercial sources without further purification.

### General procedure: (3a):

A 25 mL oven-dried reaction vessel was charged with benzamide (**1a**, 36.3 mg, 0.3 mmol), cyclohexanone (**2a**, 21  $\mu\text{L}$ , 0.2 mmol), KI (39.8 mg, 0.24 mmol) and *p*-toluenesulfonic acid (34.2 mg, 0.2 mmol), DMSO (15  $\mu\text{L}$ , 0.2 mmol). The reaction vessel was flushed with oxygen three times and then sealed. Toluene / *o*-dichlorobenzene (4:1, 1 mL) were added by syringe and the resulting solution was stirred at 160  $^\circ\text{C}$  for 30 h. After cooling to room temperature, the volatiles were removed under vacuum and the residue was purified by column chromatography (silica gel, petroleum ether/ethyl acetate = 100:2) to give **3a** as white solid; yield: 71% (27.8 mg), mp 104-105  $^\circ\text{C}$ .  $R_f$  = 0.40 (100:2 petroleum ether/ethyl acetate).

### 2-Phenylbenzoxazole (3a, CAS: 833-50-1) <sup>[1]</sup>

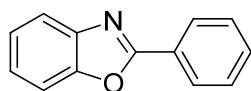

$^1\text{H}$  NMR ( $\text{CDCl}_3$ , 400 MHz, ppm):  $\delta$  8.28-8.26 (m, 2H), 7.80-7.78 (m, 1H), 7.61-7.54 (m, 4H), 7.38-7.35 (m, 2H);  $^{13}\text{C}$  NMR ( $\text{CDCl}_3$ , 100 MHz, ppm):  $\delta$  163.1, 150.8, 142.2, 131.5, 128.9, 127.7, 127.3, 125.1, 124.6, 120.1, 110.6; MS (EI)  $m/z$  (%): 195 (100), 167, 92, 77, 63, 51.

### 6-Methyl-2-phenylbenzoxazole (3b, CAS: 14016-00-3) <sup>[1]</sup>

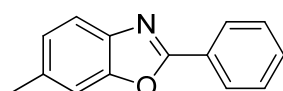

The reaction was conducted with benzamide (**1a**, 36.3 mg, 0.3 mmol) and 4-methylcyclohexanone (**2b**, 25  $\mu$ L, 0.2 mmol). The residue was purified by column chromatography (silica gel, petroleum ether/ethyl acetate = 100:2) to give **3b** as white solid; yield: 73% (30.5 mg), mp 84-86 °C.  $R_f$  = 0.41 (100:2 petroleum ether/ethyl acetate).

$^1\text{H}$  NMR ( $\text{CDCl}_3$ , 400 MHz, ppm):  $\delta$  8.24 (m, 2H), 7.65 (d,  $J$  = 8.0 Hz, 1H), 7.54 (m, 3H), 7.40 (s, 1H), 7.18 (d,  $J$  = 8.0 Hz, 1H), 2.52 (s, 3H);  $^{13}\text{C}$  NMR ( $\text{CDCl}_3$ , 100 MHz, ppm):  $\delta$  162.6, 151.1, 140.0, 135.5, 131.2, 128.8, 127.5, 127.4, 125.8, 119.4, 110.7, 21.8; MS (EI)  $m/z$  (%): 209 (100), 180, 105, 78, 51.

### 6-Ethyl-2-phenylbenzoxazole (**3c**)

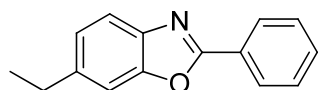

The reaction was conducted with benzamide (**1a**, 36.3 mg, 0.3 mmol) and 4-ethylcyclohexanone (**2c**, 29  $\mu$ L, 0.2 mmol). The residue was purified by column chromatography (silica gel, petroleum ether/ethyl acetate = 100:2) to give **3c** as yellow solid; yield: 62% (27.7 mg), mp 42-44 °C.  $R_f$  = 0.42 (100:2 petroleum ether/ethyl acetate).

$^1\text{H}$  NMR ( $\text{CDCl}_3$ , 400 MHz, ppm):  $\delta$  8.24 (m, 2H), 7.67 (d,  $J$  = 8.0 Hz, 1H), 7.53 (m, 3H), 7.43 (s, 1H), 7.21 (d,  $J$  = 8.0 Hz, 1H), 2.84-2.78 (q,  $J$  = 7.3 Hz, 2H), 1.32 (t,  $J$  = 7.5 Hz, 3H);  $^{13}\text{C}$  NMR ( $\text{CDCl}_3$ , 100 MHz, ppm):  $\delta$  162.7, 151.2, 142.2, 140.2, 131.2, 128.8, 127.6, 127.5, 124.8, 119.5, 109.5, 29.2, 15.9; MS (EI)  $m/z$  (%): 223, 208 (100), 180, 77, 51; HRMS (ESI) calcd. for:  $\text{C}_{15}\text{H}_{14}\text{ON}$   $[\text{M}+\text{H}]^+$  224.1069, found 224.1070.

### 6-Isopropyl-2-phenylbenzoxazole (**3d**)

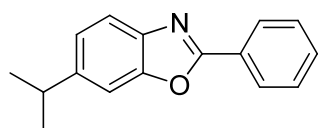

The reaction was conducted with benzamide (**1a**, 36.3 mg, 0.3 mmol) and 4-isopropylcyclohexanone (**2d**, 31  $\mu$ L, 0.2 mmol). The residue was purified by column chromatography (silica gel, petroleum ether/ethyl acetate = 100:2) to give **3d** as yellow liquid; yield: 64% (30.3 mg).  $R_f$  = 0.41 (100:2 petroleum ether/ethyl acetate).

$^1\text{H}$  NMR ( $\text{CDCl}_3$ , 400 MHz, ppm):  $\delta$  8.25-8.24 (m, 2H), 7.68 (d,  $J$  = 8.0 Hz, 1H), 7.53 (m, 3H), 7.46 (s, 1H), 7.24 (s, 1H), 3.11-3.04 (m, 1H), 1.33 (d,  $J$  = 6.9 Hz, 6H);  $^{13}\text{C}$  NMR ( $\text{CDCl}_3$ , 100 MHz, ppm):  $\delta$  162.8, 151.2, 145.0, 140.3, 131.2, 128.9, 127.6, 127.5, 123.5, 119.5, 108.0, 34.5, 24.3; MS (EI)  $m/z$  (%): 237, 222 (100), 119, 91, 77, 65; HRMS (ESI) calcd. for:  $\text{C}_{16}\text{H}_{16}\text{ON}$   $[\text{M}+\text{H}]^+$  238.1225, found 238.1226.

### 6-Pentyl-2-phenylbenzoxazole (3e)

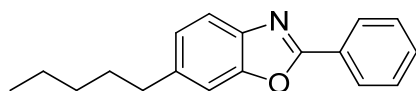

The reaction was conducted with benzamide (**1a**, 36.3 mg, 0.3 mmol) and 4-pentylcyclohexanone (**2e**, 38  $\mu\text{L}$ , 0.2 mmol). The residue was purified by column chromatography (silica gel, petroleum ether/ethyl acetate = 100:2) to give **3e** as yellow liquid; yield: 74% (39.2 mg).  $R_f$  = 0.41 (100:2 petroleum ether/ethyl acetate).

$^1\text{H}$  NMR ( $\text{CDCl}_3$ , 400 MHz, ppm):  $\delta$  8.27-8.26 (m, 2H), 7.68 (d,  $J$  = 8.1 Hz, 1H), 7.54-7.53 (m, 3H), 7.41 (s, 1H), 7.20 (d,  $J$  = 7.9 Hz, 1H), 2.76 (t,  $J$  = 7.7 Hz, 2H), 1.70-1.68 (m, 2H), 1.35 (m, 4H), 0.91 (t,  $J$  = 2.4 Hz, 3H);  $^{13}\text{C}$  NMR ( $\text{CDCl}_3$ , 100 MHz, ppm):  $\delta$  162.6, 151.2, 140.8, 140.2, 131.2, 128.8, 127.7, 127.5, 125.2, 119.4, 110.1, 36.2, 31.4, 29.7, 22.5, 13.9; MS (EI)  $m/z$  (%): 265, 208 (100), 180, 77, 51; HRMS (ESI) calcd. for:  $\text{C}_{18}\text{H}_{20}\text{ON}$   $[\text{M}+\text{H}]^+$  266.1538, found 266.1539.

### 6-tert-pentyl-2-phenylbenzoxazole (3f)

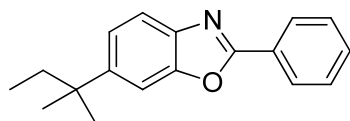

The reaction was conducted with benzamide (**1a**, 36.3 mg, 0.3 mmol) and 4-tert-pentylcyclohexanone (**2f**, 38  $\mu\text{L}$ , 0.2 mmol). The residue was purified by column chromatography (silica gel, petroleum ether/ethyl acetate = 100:2) to give **3f** as yellow liquid; yield: 76% (40.2 mg).  $R_f$  = 0.43 (100:2 petroleum ether/ethyl acetate).

$^1\text{H}$  NMR ( $\text{CDCl}_3$ , 400 MHz, ppm):  $\delta$  8.27-8.26 (m, 2H), 7.71 (d,  $J$  = 8.4 Hz, 1H), 7.57-7.53 (m, 4H), 7.37 (d,  $J$  = 8.4 Hz, 1H), 1.75-1.70 (q,  $J$  = 7.3 Hz, 2H), 1.37 (s, 6H), 0.70 (t,  $J$  = 7.4 Hz, 3H);  $^{13}\text{C}$  NMR ( $\text{CDCl}_3$ , 100 MHz, ppm):  $\delta$  162.9, 151.2, 147.7, 139.8, 131.2, 128.9, 127.5, 122.8, 119.4, 119.1, 108.1, 38.5, 37.2, 28.9, 9.1; MS (EI)  $m/z$  (%): 265, 250, 236 (100), 208, 105, 77; HRMS

(ESI) calcd. for: C<sub>18</sub>H<sub>20</sub>ON [M+H]<sup>+</sup> 266.1539, found 266.1539.

**2,6-Diphenylbenzoxazole (3g, CAS: 59005-65-1)** <sup>[1]</sup>

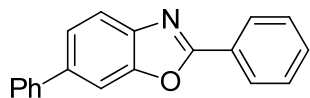

The reaction was conducted with benzamide (**1a**, 36.3 mg, 0.3 mmol) and 4-phenylcyclohexanone (**2g**, 34.8 mg, 0.2 mmol). The residue was purified by column chromatography (silica gel, petroleum ether/ethyl acetate = 100:2) to give **3g** as white solid; yield: 82% (44.4 mg), mp 108-110 °C. R<sub>f</sub> = 0.37 (100:2 petroleum ether/ethyl acetate).

<sup>1</sup>H NMR (CDCl<sub>3</sub>, 400 MHz, ppm): δ 8.33-8.31 (m, 2H), 7.86-7.82 (m, 2H), 7.67-7.65(m, 2H), 7.62 (m, 1H), 7.57-7.56 (m, 3H), 7.51-7.48 (m, 2H), 7.42-7.38 (m, 1H); <sup>13</sup>C NMR (CDCl<sub>3</sub>, 100 MHz, ppm): δ 163.5, 151.5, 141.6, 140.9, 139.1, 131.5, 129.0, 128.9, 127.7, 127.5, 127.4, 127.3, 124.2, 120.0, 109.1; MS (EI) m/z (%): 271(100), 243, 189, 139, 121, 77.

**Ethyl 2-phenylbenzoxazole-6-carboxylate (3h, CAS: 1094201-00-9)** <sup>[2]</sup>

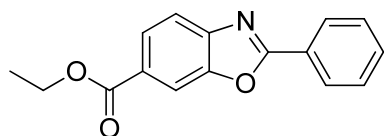

The reaction was conducted with benzamide (**1a**, 36.3 mg, 0.3 mmol) and ethyl 4-oxocyclohexanecarboxylate (**2h**, 32 μL, 0.2 mmol). The residue was purified by column chromatography (silica gel, petroleum ether/ethyl acetate = 60:2) to give **3h** as white solid; yield: 68% (36.3 mg), mp 79-81 °C. R<sub>f</sub> = 0.26 (60:2 petroleum ether/ethyl acetate).

<sup>1</sup>H NMR (CDCl<sub>3</sub>, 400 MHz, ppm): δ 8.30 (m, 3H), 8.12 (d, *J* = 8.1 Hz, 1H), 7.80 (d, *J* = 8.3 Hz, 1H), 7.58-7.56 (m, 3H), 4.46-4.41 (q, *J* = 6.9 Hz, 2H), 1.45 (t, *J* = 7.1 Hz, 3H); <sup>13</sup>C NMR (CDCl<sub>3</sub>, 100 MHz, ppm): δ 166.1, 165.5, 150.5, 146.0, 140.9, 132.1, 129.0, 128.0, 127.8, 126.4, 119.5, 112.2, 61.3, 14.4; MS (EI) m/z (%): 267, 239, 222 (100), 166, 139, 63.

**8-Methyl-2-Phenylbenzoxazole (3i)**

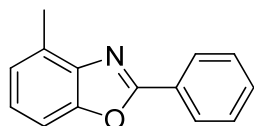

The reaction was conducted with benzamide (**1a**, 36.3 mg, 0.3 mmol) and 2-methylcyclohexanone (**2i**, 25  $\mu$ L, 0.2 mmol). The residue was purified by GC, yield: 5%.

### 2-Phenylbenzoxazole (**3a**, CAS: 833-50-1) <sup>[1]</sup>

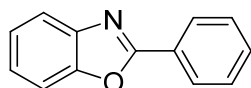

<sup>1</sup>H NMR (CDCl<sub>3</sub>, 400 MHz, ppm):  $\delta$  8.28-8.26 (m, 2H), 7.80-7.78 (m, 1H), 7.61-7.54 (m, 4H), 7.38-7.35 (m, 2H); <sup>13</sup>C NMR (CDCl<sub>3</sub>, 100 MHz, ppm):  $\delta$  163.1, 150.8, 142.2, 131.5, 128.9, 127.7, 127.3, 125.1, 124.6, 120.1, 110.6; MS (EI) m/z (%): 95 (100), 167, 92, 77, 63, 51.

The reaction was conducted with benzamide (**1a**, 36.3 mg, 0.3 mmol) and 2-chlorocyclohexanone (**2j**, 23  $\mu$ L, 0.2 mmol). The residue was purified by column chromatography (silica gel, petroleum ether/ethyl acetate = 100:2) to give **3a** as white solid; yield: 52% (20.3 mg), mp 104-105 °C. R<sub>f</sub> = 0.40 (100:2 petroleum ether/ethyl acetate).

### 7-Methyl-2-Phenylbenzoxazole (**3k**) and 5-Methyl-2-Phenylbenzoxazole (**3k'**)

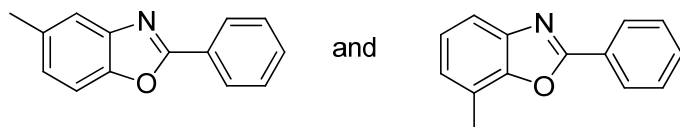

The reaction was conducted with benzamide (**1a**, 36.3 mg, 0.3 mmol) and 3-methylcyclohexanone (**2k**, 25  $\mu$ L, 0.2 mmol). The residue was purified by column chromatography (silica gel, petroleum ether/ethyl acetate = 100:2) to give **3k** and **3k'** (2 : 1) as yellow solid; yield: 80% (33.4 mg). R<sub>f</sub> = 0.46 (100:2 petroleum ether/ethyl acetate).

### 2-(4-Methylphenyl)benzoxazole (**3l**, CAS: 835-71-2) <sup>[3]</sup>

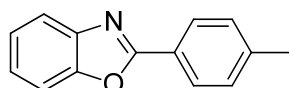

The reaction was conducted with 4-methylbenzamide (**1b**, 40.5 mg, 0.3 mmol) and cyclohexanone (**2a**, 21  $\mu$ L, 0.2 mmol). The residue was purified by column chromatography (silica gel, petroleum ether/ethyl acetate = 100:2) to give **3l** as white solid; yield: 75% (31.4 mg), mp 112-114 °C. R<sub>f</sub> = 0.47 (100:2 petroleum ether/ethyl acetate).

<sup>1</sup>H NMR (CDCl<sub>3</sub>, 400 MHz, ppm): δ 8.18 (d, *J* = 8.0 Hz, 2H), 7.80-7.78 (m, 1H), 7.60-7.58 (m, 1H), 7.38-7.34 (m, 4H), 2.45 (s, 3H); <sup>13</sup>C NMR (CDCl<sub>3</sub>, 100 MHz, ppm): δ 163.3, 150.7, 142.2, 142.1, 129.7, 127.6, 124.9, 124.5, 124.4, 119.9, 110.5, 21.7; MS (EI) *m/z* (%): 209 (100), 180, 116, 91, 63.

**2-(4-*tert*-Butylphenyl)benzoxazole (3m, CAS: 5998-50-5)** <sup>[4]</sup>

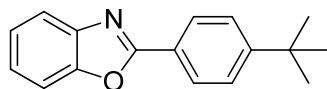

The reaction was conducted with 4-(*tert*-butyl)benzamide (**1c**, 53.1 mg, 0.3 mmol) and cyclohexanone (**2a**, 21 μL, 0.2 mmol). The residue was purified by column chromatography (silica gel, petroleum ether/ethyl acetate = 100:2) to give **3m** as white solid; yield: 77% (38.7 mg), mp 102-104 °C. *R*<sub>f</sub> = 0.42 (100:2 petroleum ether/ethyl acetate).

<sup>1</sup>H NMR (CDCl<sub>3</sub>, 400 MHz, ppm): δ 8.22 (d, *J* = 8.3 Hz, 2H), 7.81-7.79 (m, 1H), 7.61-7.55 (m, 4H), 7.38-7.36 (m, 1H), 1.38 (s, 9H); <sup>13</sup>C NMR (CDCl<sub>3</sub>, 100 MHz, ppm): δ 163.3, 155.1, 150.8, 142.3, 127.5, 125.9, 124.9, 124.5, 124.4, 119.9, 110.5, 35.1, 31.2; MS (EI) *m/z* (%): 251, 236 (100), 208, 104, 63.

**2-(4-Methoxyphenyl)benzoxazole (3n, CAS: 838-34-6)** <sup>[4]</sup>

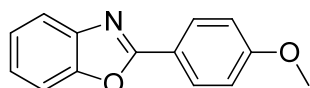

The reaction was conducted with 4-methoxybenzamide (**1d**, 45.3 mg, 0.3 mmol) and cyclohexanone (**2a**, 21 μL, 0.2 mmol). The residue was purified by column chromatography (silica gel, petroleum ether/ethyl acetate = 100:2) to give **3n** as white solid; yield: 71% (32.0 mg), mp 97-99 °C. *R*<sub>f</sub> = 0.20 (100:2 petroleum ether/ethyl acetate).

<sup>1</sup>H NMR (CDCl<sub>3</sub>, 400 MHz, ppm): δ 8.21 (d, *J* = 7.8 Hz, 2H), 7.75-7.74 (m, 1H), 7.56 (m, 1H), 7.34-7.33 (m, 2H), 7.04 (d, *J* = 7.7 Hz, 2H), 3.90 (s, 3H); <sup>13</sup>C NMR (CDCl<sub>3</sub>, 100 MHz, ppm): δ 163.2, 162.4, 150.7, 142.4, 129.4, 124.6, 124.4, 119.8, 119.7, 114.4, 110.4, 55.4; MS (EI) *m/z* (%): 225 (100), 210, 182, 113, 63.

**2-(4-Fluorophenyl)benzoxazole (3o, CAS: 397-54-6)** <sup>[3]</sup>

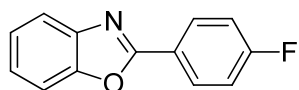

The reaction was conducted with 4-fluorobenzamide (**1e**, 41.7 mg, 0.3 mmol) and cyclohexanone (**2a**, 21  $\mu$ L, 0.2 mmol). The residue was purified by column chromatography (silica gel, petroleum ether/ethyl acetate = 100:2) to give **3o** as white solid; yield: 82% (34.9 mg), mp 101-103 °C.  $R_f$  = 0.41 (100:2 petroleum ether/ethyl acetate).

$^1\text{H}$  NMR ( $\text{CDCl}_3$ , 400 MHz, ppm):  $\delta$  8.31-8.28 (m, 2H), 7.80-7.78 (m, 1H), 7.61-7.58 (m, 1H), 7.39-7.37 (m, 2H), 7.25-7.21 (m, 2H);  $^{13}\text{C}$  NMR ( $\text{CDCl}_3$ , 100 MHz, ppm):  $\delta$  164.8 (d,  $J_{\text{C-F}}$  = 251.3 Hz), 162.2, 150.8, 142.1, 129.8 (d,  $J_{\text{C-F}}$  = 8.8 Hz), 125.1, 124.6, 123.6 (d,  $J_{\text{C-F}}$  = 3.2 Hz), 120.0, 116.2 (d,  $J_{\text{C-F}}$  = 22.1 Hz), 110.5; MS (EI)  $m/z$  (%): 213 (100), 185, 121, 92, 63.

**2-(4-Chlorophenyl)benzoxazole (3p, CAS: 1141-35-1)** <sup>[3]</sup>

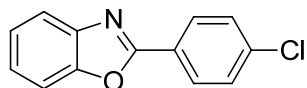

The reaction was conducted with 4-chlorobenzamide (**1f**, 46.7 mg, 0.3 mmol) and cyclohexanone (**2a**, 21  $\mu$ L, 0.2 mmol). The residue was purified by column chromatography (silica gel, petroleum ether/ethyl acetate = 100:2) to give **3p** as white solid; yield: 83% (38.0 mg), mp 150-152 °C.  $R_f$  = 0.47 (100:2 petroleum ether/ethyl acetate).

$^1\text{H}$  NMR ( $\text{CDCl}_3$ , 400 MHz, ppm):  $\delta$  8.20 (d,  $J$  = 8.4 Hz, 2H), 7.79-7.77 (m, 1H), 7.60-7.58 (m, 1H), 7.51 (d,  $J$  = 8.3 Hz, 2H), 7.39-7.36 (m, 2H);  $^{13}\text{C}$  NMR ( $\text{CDCl}_3$ , 100 MHz, ppm):  $\delta$  162.1, 150.8, 142.1, 137.8, 129.3, 128.9, 125.7, 125.3, 124.7, 120.1, 110.6; MS (EI)  $m/z$  (%): 229 (100), 201, 166, 92, 63.

**2-(4-Bromophenyl)benzoxazole (3q, CAS: 3164-13-4)** <sup>[5]</sup>

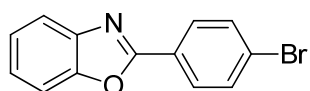

The reaction was conducted with 4-bromobenzamide (**1g**, 59.7 mg, 0.3 mmol) and cyclohexanone (**2a**, 21  $\mu$ L, 0.2 mmol). The residue was purified by column chromatography (silica gel, petroleum ether/ethyl acetate = 100:2) to give **3q** as white solid; yield: 76% (41.6 mg), mp 160-162 °C.  $R_f$  =



0.47 (100:2 petroleum ether/ethyl acetate).

$^1\text{H}$  NMR ( $\text{CDCl}_3$ , 400 MHz, ppm):  $\delta$  8.12 (d,  $J$  = 8.3 Hz, 2H), 7.79-7.77 (m, 1H), 7.67 (d,  $J$  = 8.3 Hz, 2H), 7.60-7.58 (m, 1H) 7.39-7.36 (m, 2H);  $^{13}\text{C}$  NMR ( $\text{CDCl}_3$ , 100 MHz, ppm):  $\delta$  162.1, 150.8, 142.1, 138.1, 132.2, 129.0, 126.2, 125.4, 124.7, 120.1, 110.6; MS (EI)  $m/z$  (%): 273 (100), 245, 194, 92, 63.

**2-(3-Methylphenyl)benzoxazole (3r, CAS: 14625-58-2)** <sup>[5]</sup>

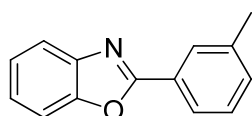

The reaction was conducted with 3-methylbenzamide (**1h**, 40.5 mg, 0.3 mmol) and cyclohexanone (**2a**, 21  $\mu\text{L}$ , 0.2 mmol). The residue was purified by column chromatography (silica gel, petroleum ether/ethyl acetate = 100:2) to give **3r** as white solid; yield: 64% (26.8 mg), mp 75-77  $^\circ\text{C}$ .  $R_f$  = 0.53 (100:2 petroleum ether/ethyl acetate).

$^1\text{H}$  NMR ( $\text{CDCl}_3$ , 400 MHz, ppm):  $\delta$  8.12 (s, 1H), 8.07 (d,  $J$  = 7.2 Hz, 1H), 7.80-7.79 (m, 1H), 7.60-7.59 (m, 1H), 7.45-7.43 (m, 1H) 7.38-7.36 (m, 3H), 2.47 (s, 3H);  $^{13}\text{C}$  NMR ( $\text{CDCl}_3$ , 100 MHz, ppm):  $\delta$  163.3, 150.8, 142.2, 138.7, 132.3, 128.8, 128.2, 127.1, 125.0, 124.8, 124.4, 120.0, 110.6, 21.3; MS (EI)  $m/z$  (%): 209 (100), 180, 116, 91, 63.

**2-(2-Hydroxyphenyl)benzoxazole (3s, CAS: 835-64-3)** <sup>[4]</sup>

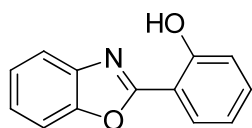

The reaction was conducted with 2-hydroxybenzamide (**1i**, 41.1 mg, 0.3 mmol) and cyclohexanone (**2a**, 21  $\mu\text{L}$ , 0.2 mmol). The residue was purified by column chromatography (silica gel, petroleum ether/ethyl acetate = 100:2) to give **3s** as white solid; yield: 67% (28.3 mg), mp 122-124  $^\circ\text{C}$ .  $R_f$  = 0.26 (100:2 petroleum ether/ethyl acetate).

$^1\text{H}$  NMR ( $\text{CDCl}_3$ , 400 MHz, ppm):  $\delta$  11.5 (s, 1H), 8.03 (d,  $J$  = 7.6 Hz, 1H), 7.75-7.73 (m, 1H), 7.63-7.61 (m, 1H), 7.47-7.38 (m, 3H), 7.13 (d,  $J$  = 8.3 Hz, 1H), 7.02 (t,  $J$  = 7.4 Hz, 1H);  $^{13}\text{C}$  NMR ( $\text{CDCl}_3$ , 100 MHz, ppm):  $\delta$  163.0, 158.8, 149.2, 140.1, 133.5, 127.1, 125.5, 125.4, 125.0, 119.5, 119.3, 117.5, 110.6; MS (EI)  $m/z$  (%): 211 (100), 183, 154, 91, 63.

### 2-(2,6-Difluorophenyl)benzoxazole (3t)

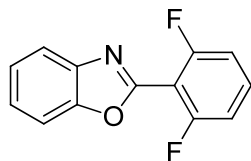

The reaction was conducted with 2,6-difluorobenzamide (**1j**, 47.1 mg, 0.3 mmol) and cyclohexanone (**2a**, 21  $\mu$ L, 0.2 mmol). The residue was purified by column chromatography (silica gel, petroleum ether/ethyl acetate = 100:2) to give **3t** as white solid; yield: 51% (23.6 mg), mp 74-76 °C.  $R_f$  = 0.50 (100:2 petroleum ether/ethyl acetate).

$^1\text{H}$  NMR ( $\text{CDCl}_3$ , 400 MHz, ppm):  $\delta$  7.90-7.88 (m, 1H), 7.66-7.64 (m, 1H), 7.55-7.48 (m, 1H), 7.43-7.39 (m, 2H), 7.11(t,  $J$  = 8.6 Hz, 2H);  $^{13}\text{C}$  NMR ( $\text{CDCl}_3$ , 100 MHz, ppm):  $\delta$  161.2 (dd,  $J_{\text{C-F}}$  = 257.2,  $J_2$  = 5.4 Hz), 154.8, 150.5, 141.4, 132.9 (t,  $J_{\text{C-F}}$  = 10.6 Hz), 125.8, 124.7, 120.6, 112.5-112.3 (m), 110.9, 106.5 (t,  $J_{\text{C-F}}$  = 15.7 Hz); MS (EI)  $m/z$  (%): 231 (100), 203, 139, 92, 63; HRMS (ESI) calcd. for:  $\text{C}_{13}\text{H}_8\text{ONF}_2$   $[\text{M}+\text{H}]^+$  232.0566, found 232.0569.

### 2-Phenyl-4,5,6,7-tetrahydrobenzoxazole (4a, CAS: 61766-91-4) <sup>[6]</sup>

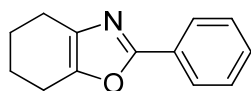

A 25 mL oven-dried reaction vessel was charged with benzamide (**1a**, 36.3 mg, 0.3 mmol), cyclohexanone (**2a**, 21  $\mu$ L, 0.2 mmol), KI (39.8 mg, 0.24 mmol) and *p*-TsOH (34.2 mg, 0.2 mmol), DMSO (15 $\mu$ L, 0.2 mmol). The reaction vessel was flushed with oxygen three times and then sealed. Toluene/*o*-dichlorobenzene (0.8 mL / 0.2 mL) were added by syringe and the resulting solution was stirred at 160 °C for 2 h. After cooling to room temperature, the volatiles were removed under vacuum and the residue was purified by column chromatography (silica gel, petroleum ether/ethyl acetate = 100:2) to give **4a** as white solid; mp 73-75 °C.  $R_f$  = 0.43 (100:2 petroleum ether/ethyl acetate).

$^1\text{H}$  NMR ( $\text{CDCl}_3$ , 400 MHz, ppm):  $\delta$  8.01-7.99 (m, 2H), 7.43-7.41 (m, 3H), 2.70-2.61 (m, 4H), 1.91-1.85 (m, 4H);  $^{13}\text{C}$  NMR ( $\text{CDCl}_3$ , 100 MHz, ppm):  $\delta$  159.8, 146.9, 135.2, 129.6, 128.6, 128.2, 125.9, 23.2, 23.0, 23.0, 22.0; MS (EI)  $m/z$  (%): 199 (100), 171, 103, 77, 51.

## References:

- [1] S. Ueda, H. Nagasawa, *Angew. Chem. Int. Ed.* **2008**, 47, 6411.
- [2] Mitsubishi Tanabe Pharma Corporation, Patent; EP2172450 A1 English, **2010**.
- [3] L. Wang, X. Ren, J. Yu, Y. Jiang, J. Cheng, *J. Org. Chem.* **2013**, 78, 12076.
- [4] Y. Cho, C. Y. Lee, D. C. Ha, C. H. Cheon, *Adv. Synth. Catal.* **2012**, 354, 2992.
- [5] X. W. Li, B. S. Wan, X. Z. Yu, *Org. Biomol. Chem.* **2012**, 10, 7479.
- [6] A. O'Brate, W. Brenzovich, D. Chen, P. Giannakakou, N. Giuseppone, J. Hao, X. Huang, P. Rao, G. Rassias, M. Reddy, S. Snyder, *J. Am. Chem. Soc.* **2004**, 126, 12897.

# <sup>1</sup>H and <sup>13</sup>C NMR spectra of product

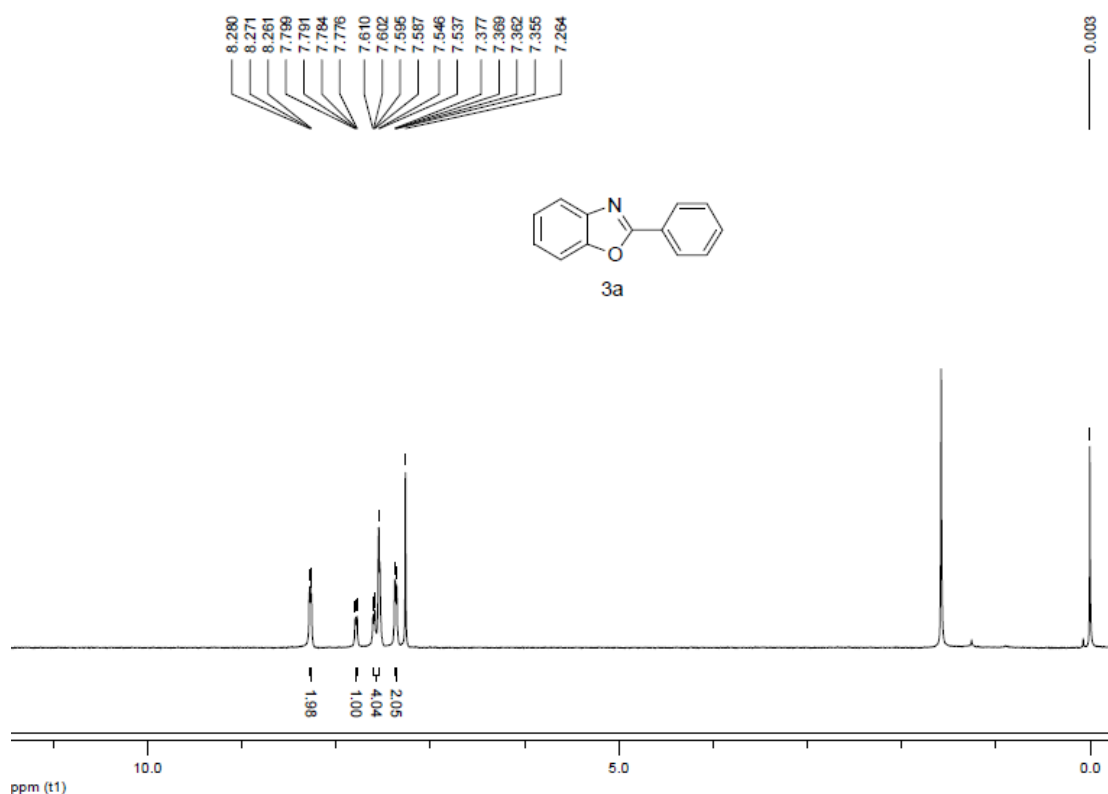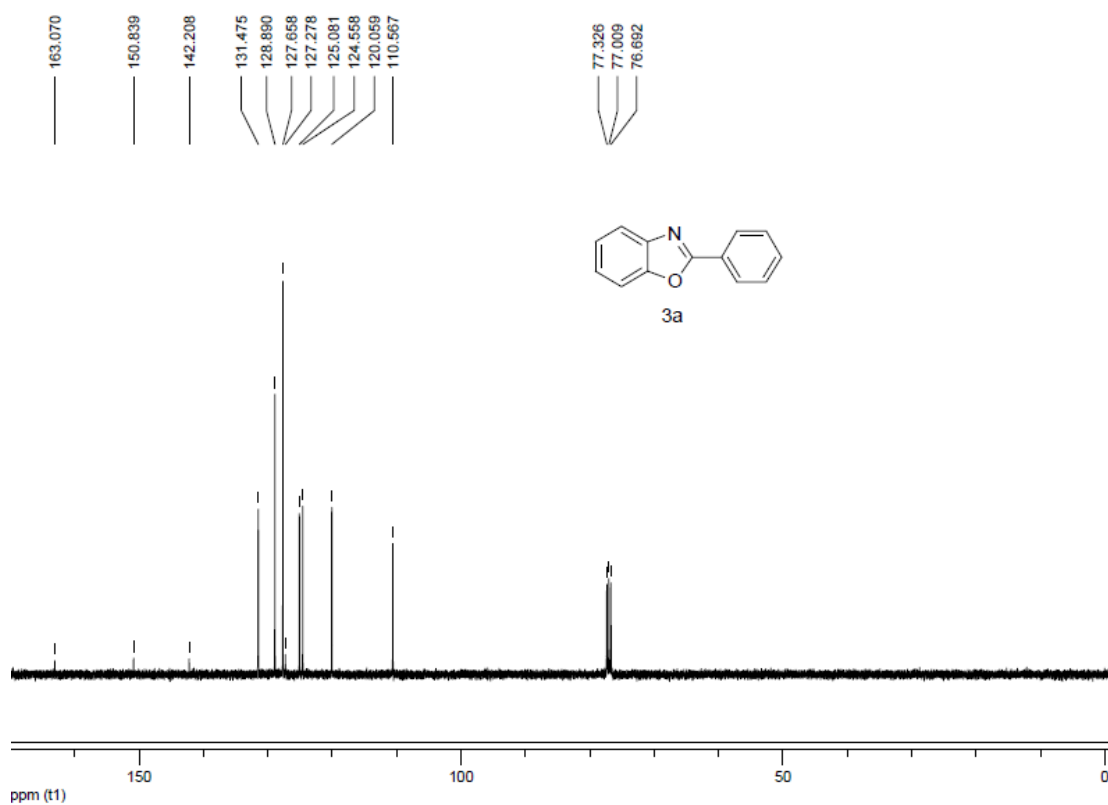

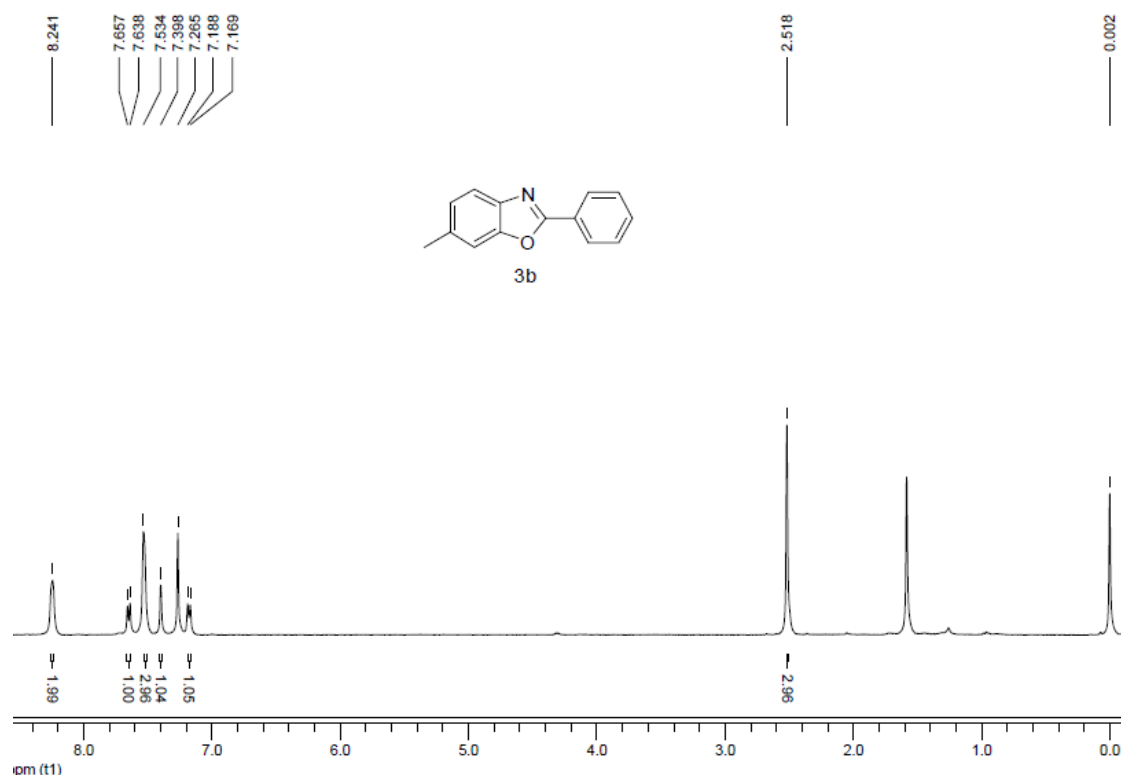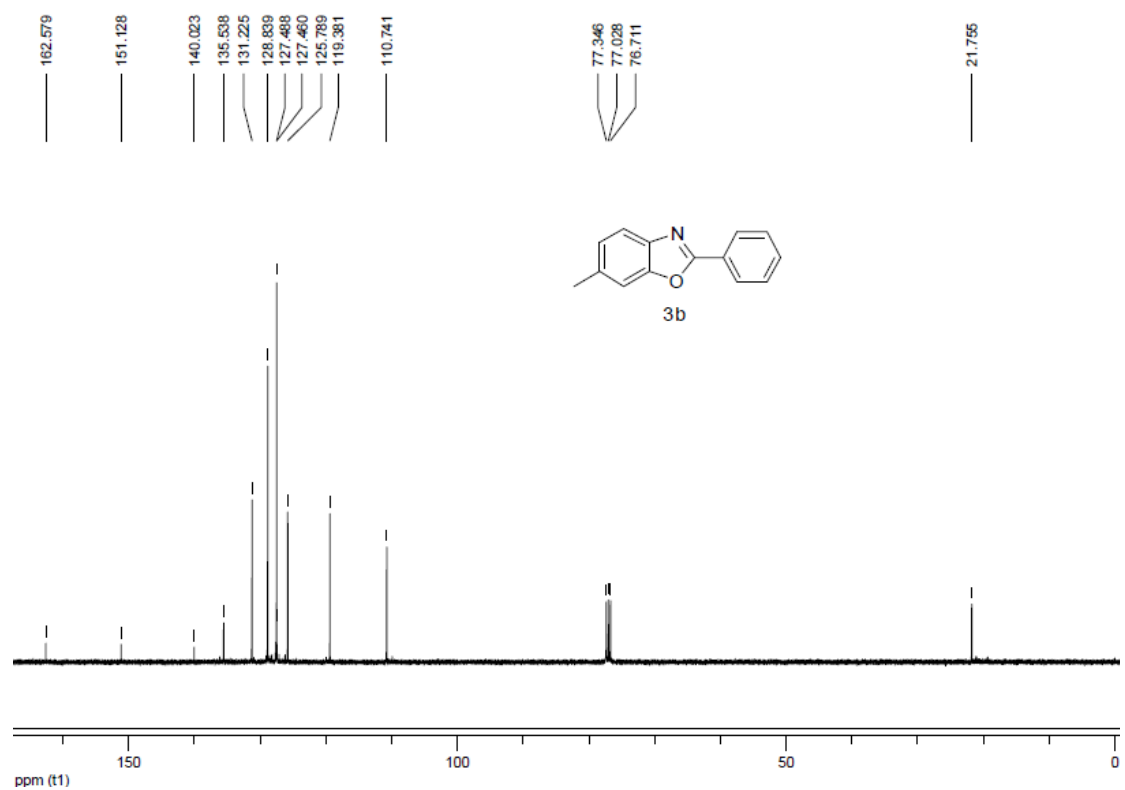

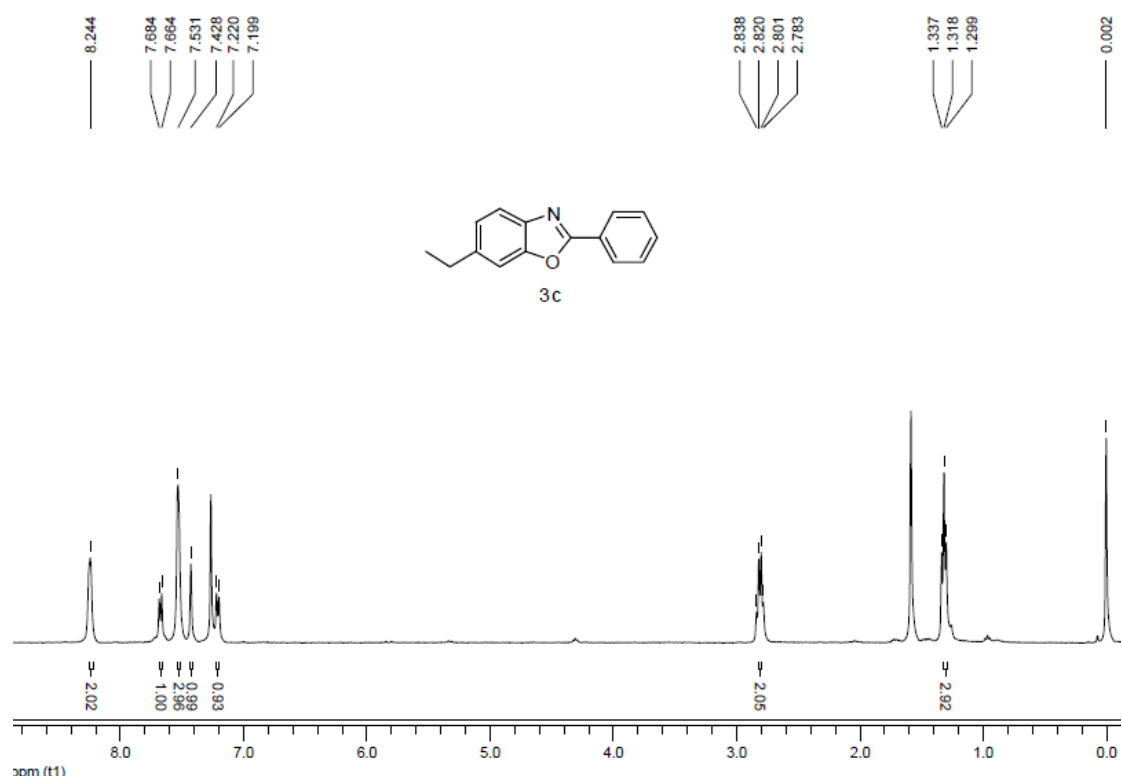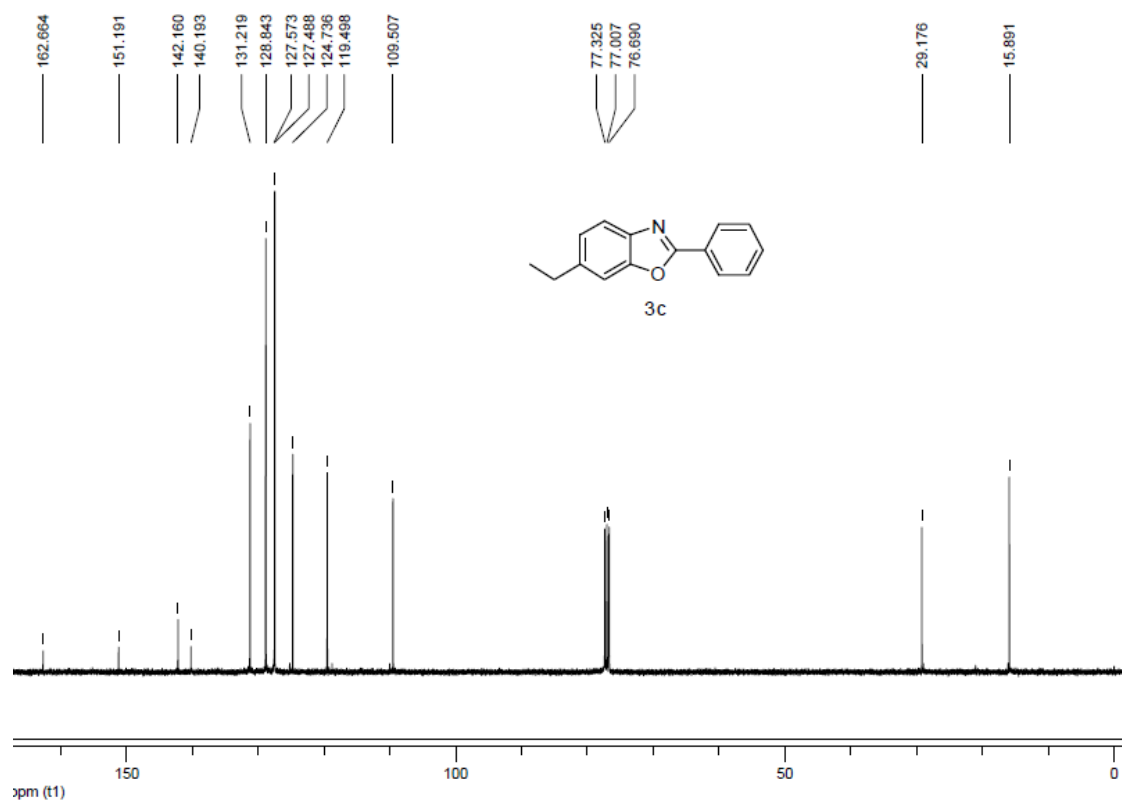

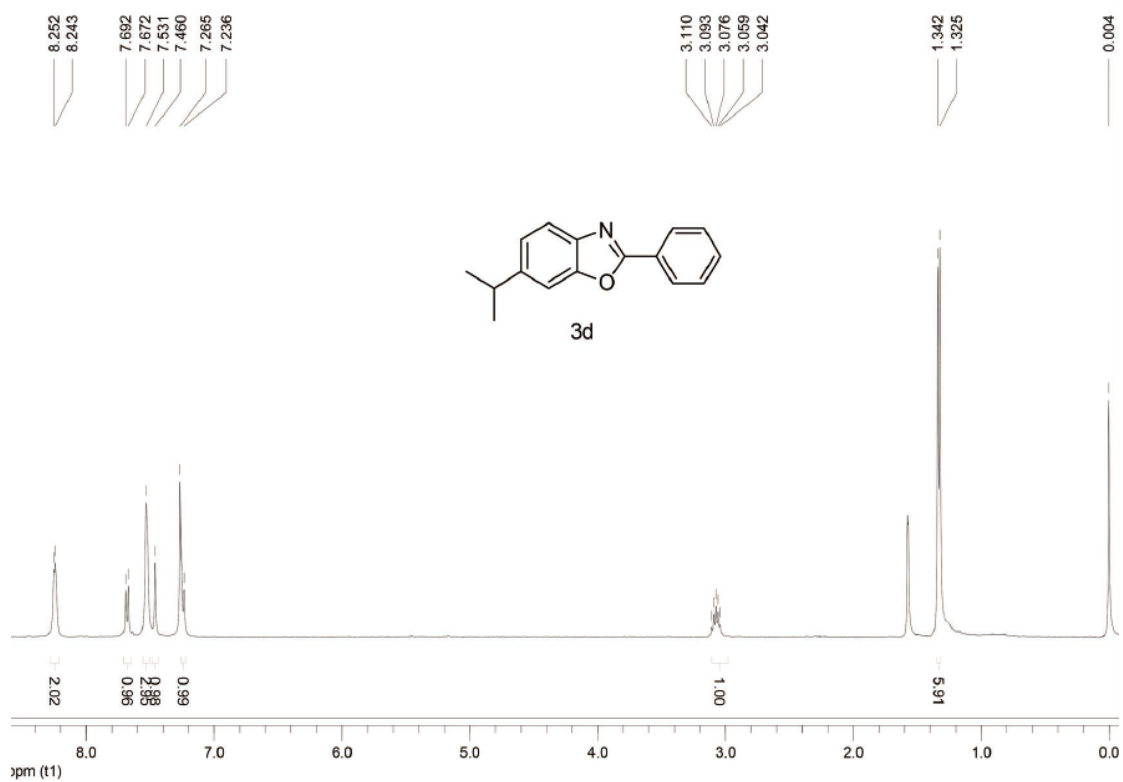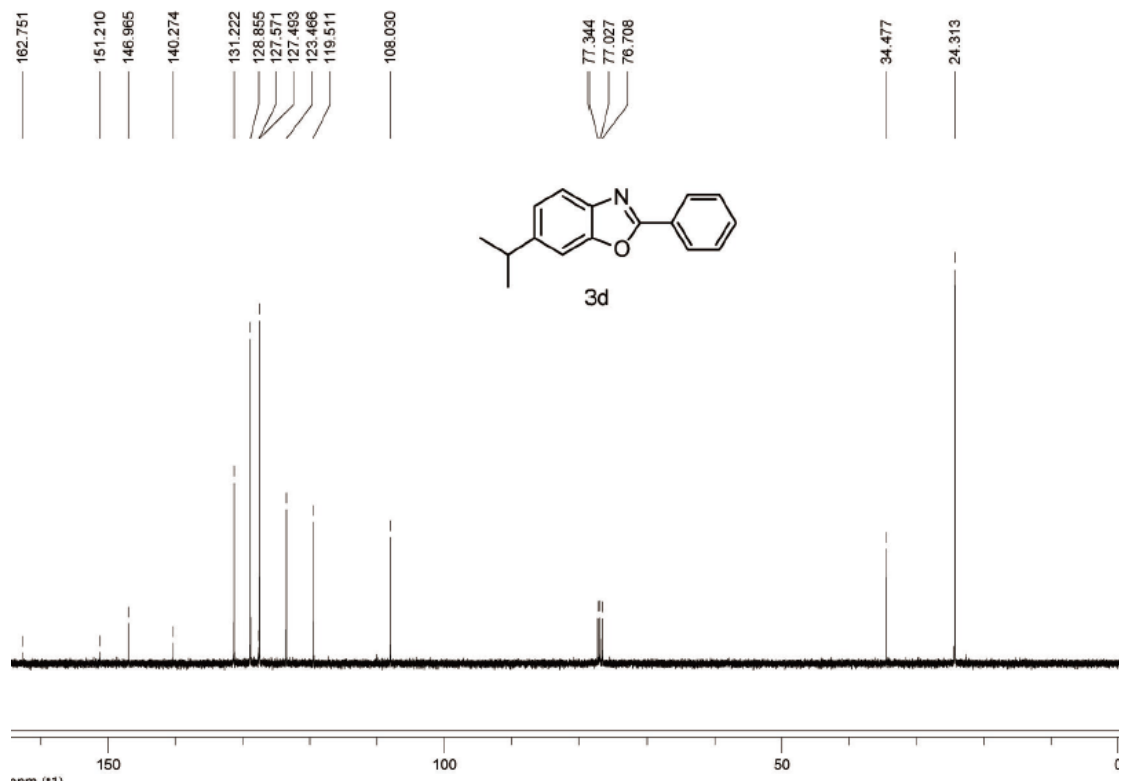

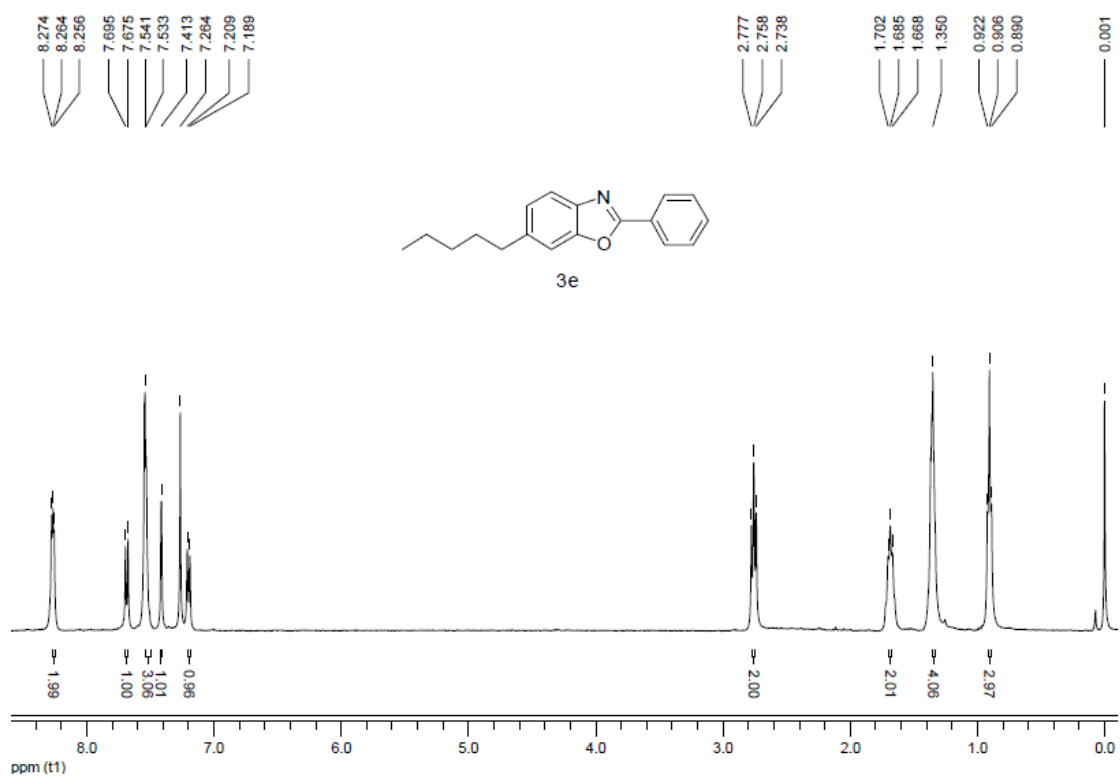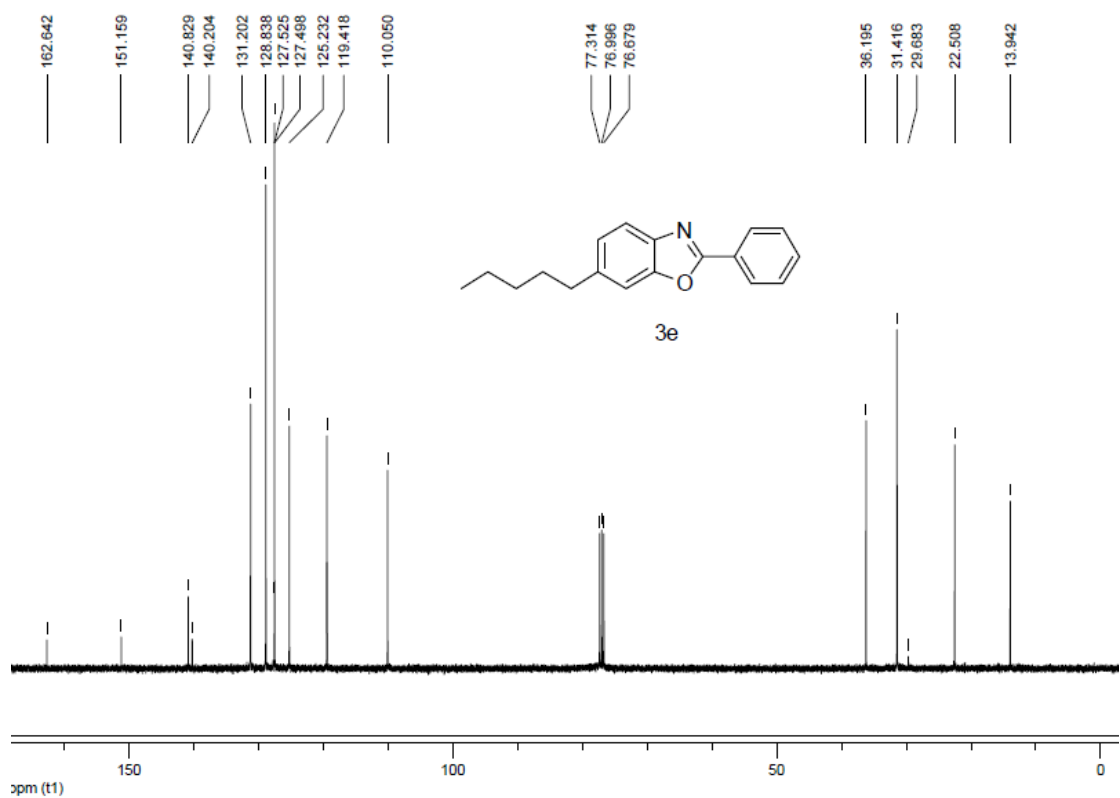



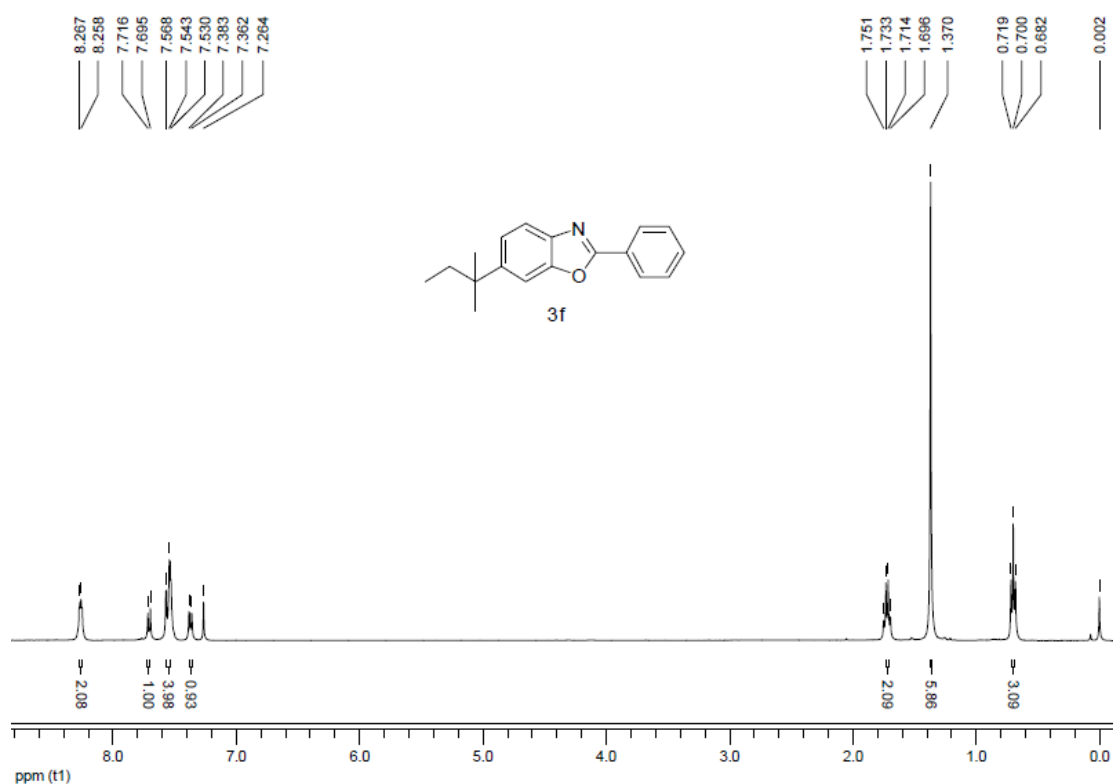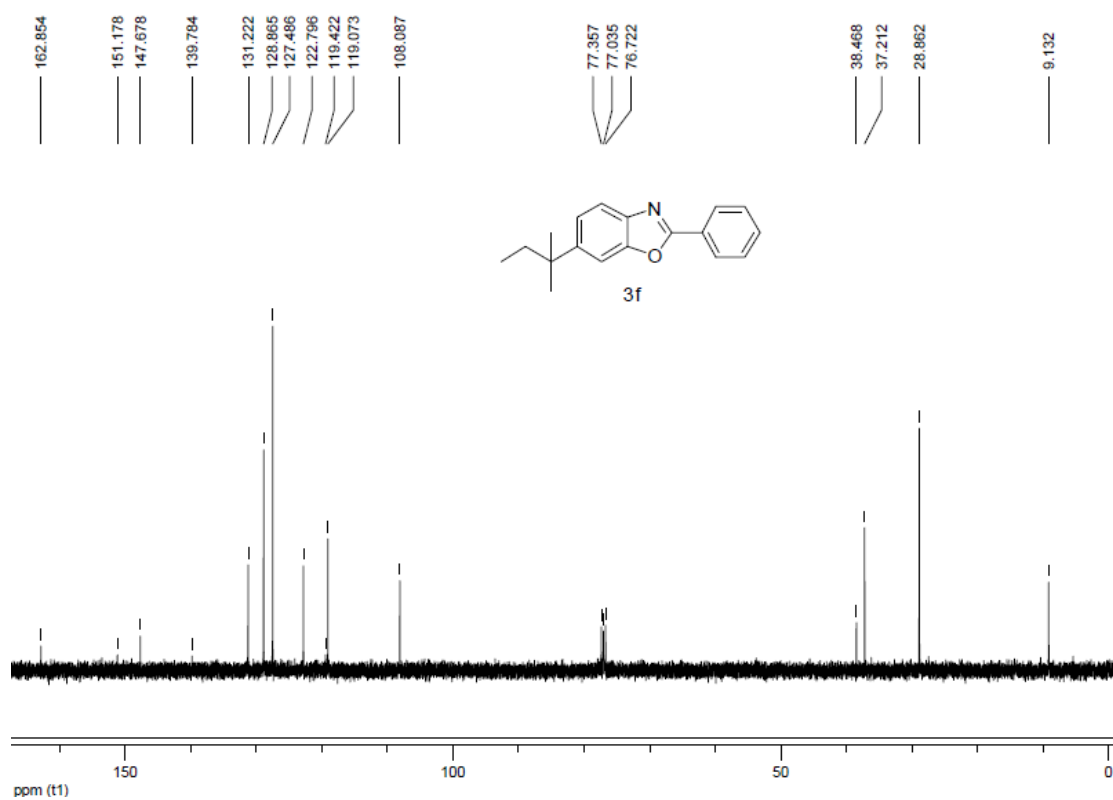

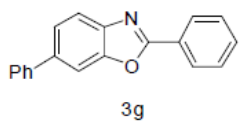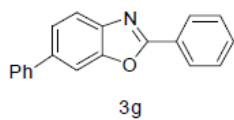

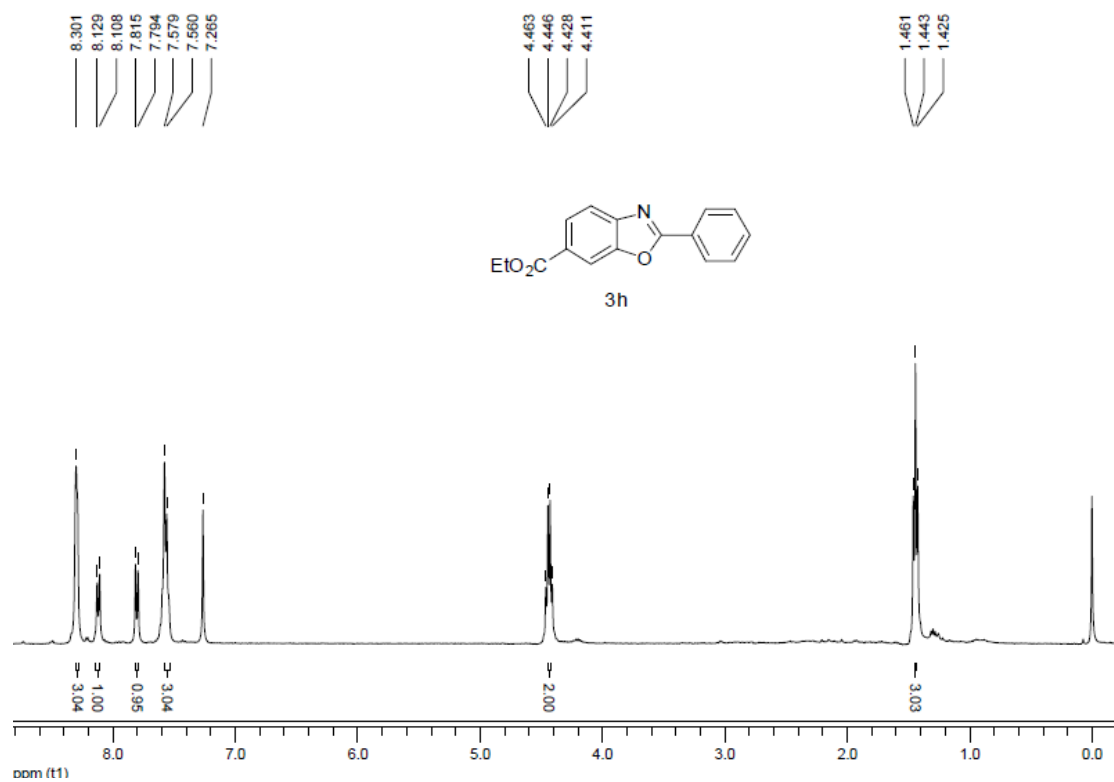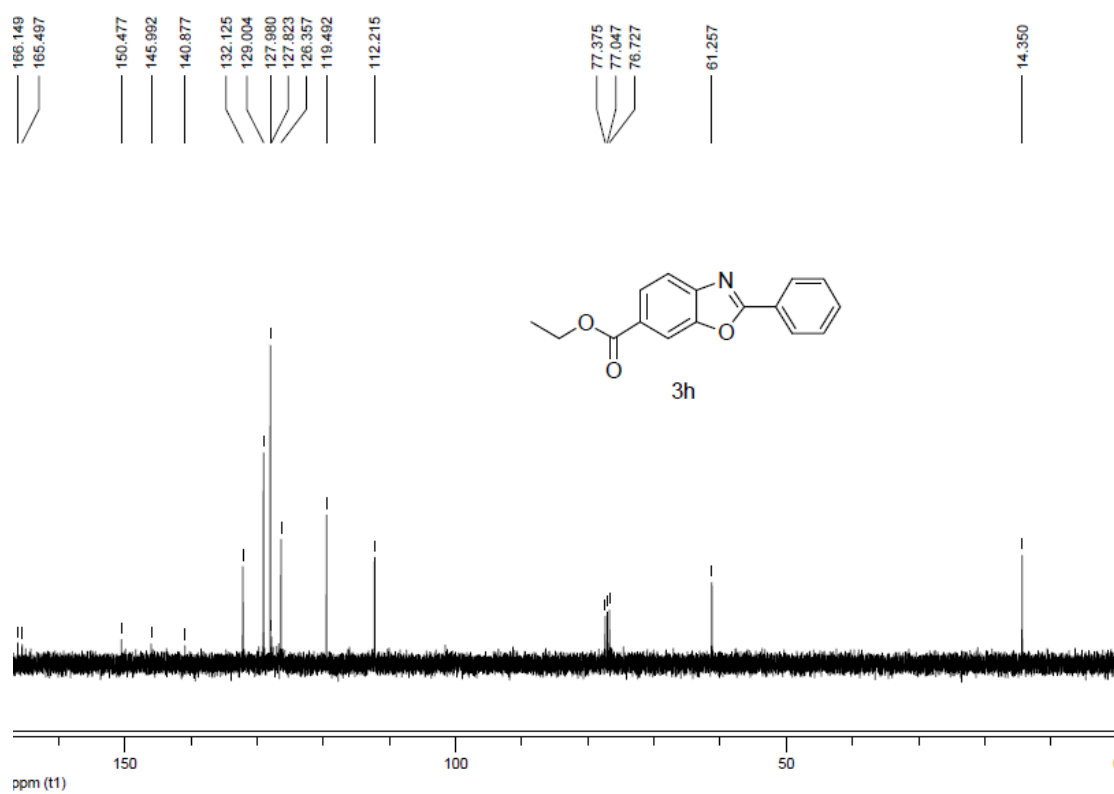

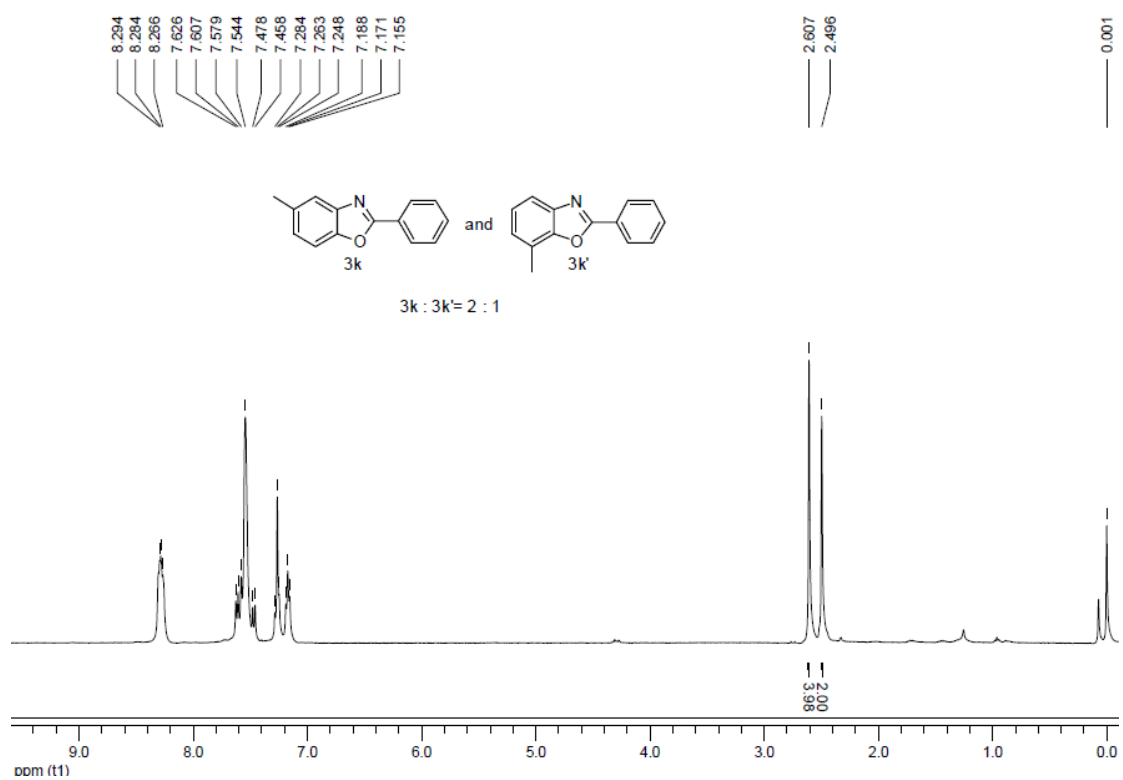

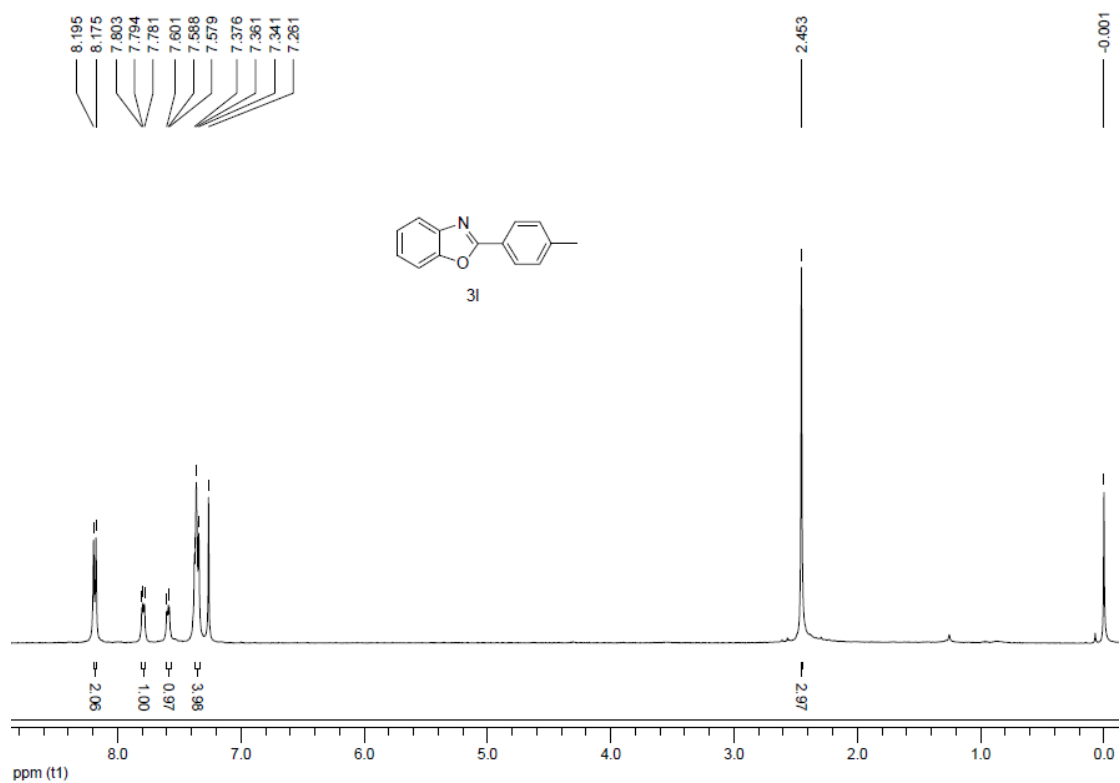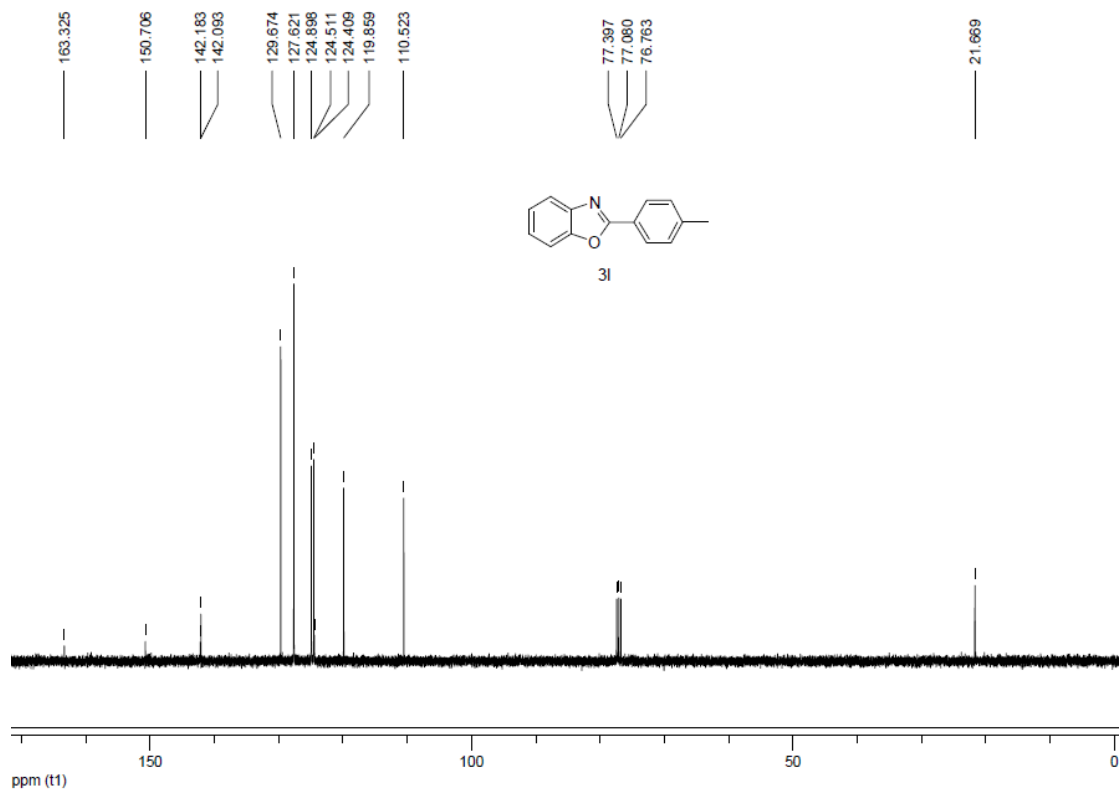

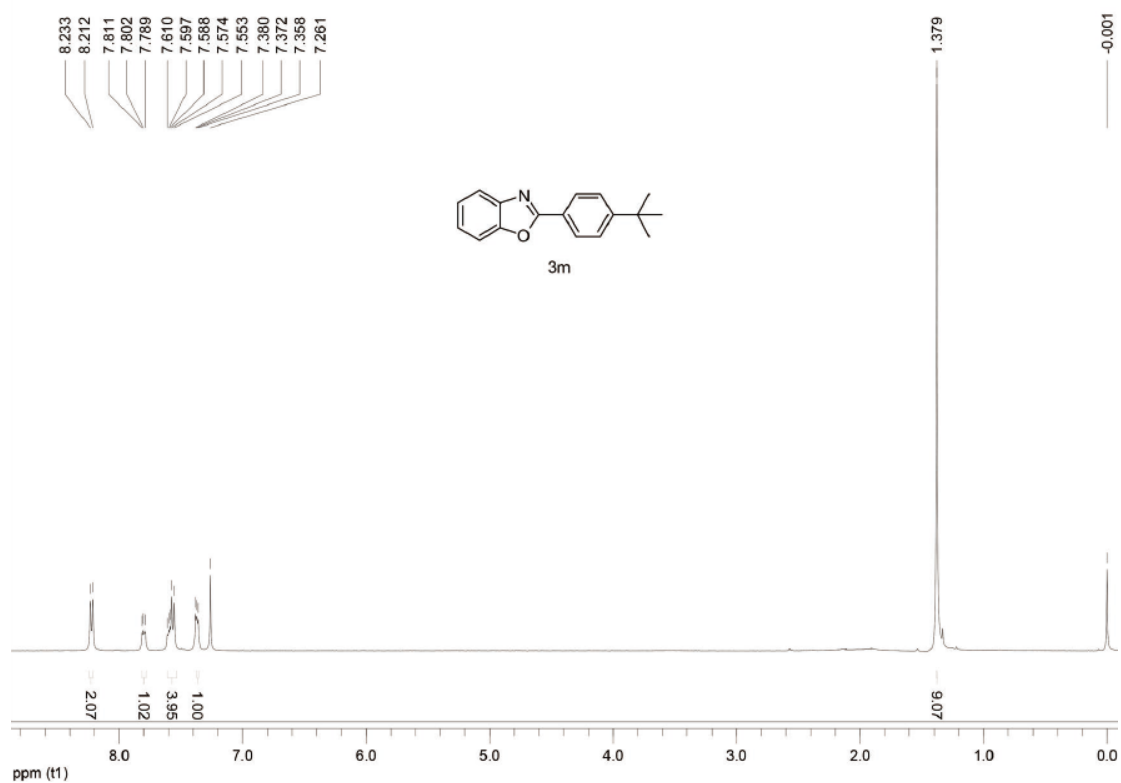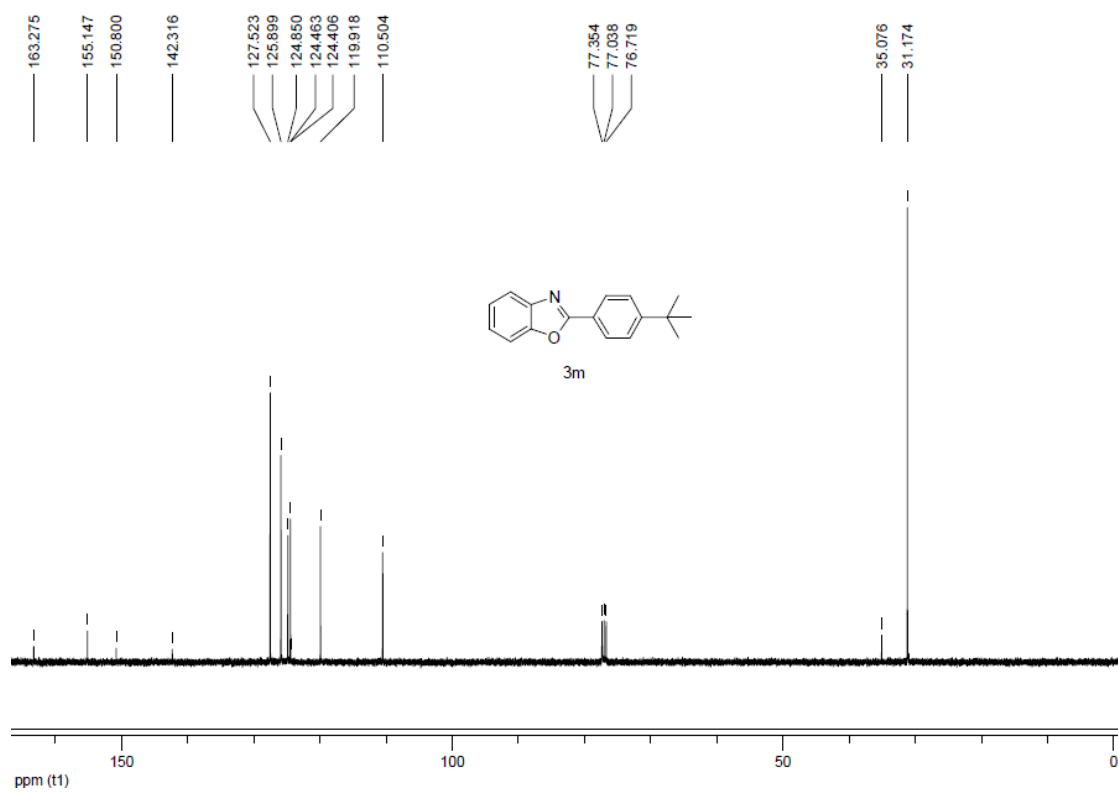

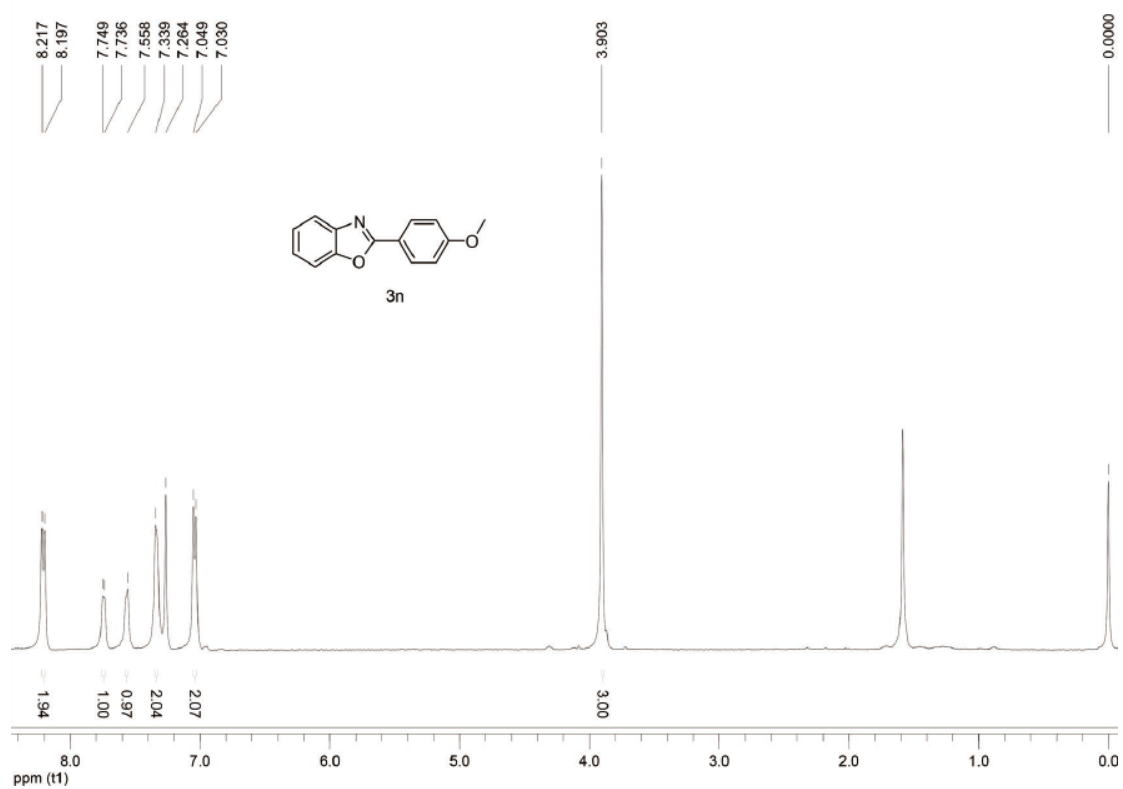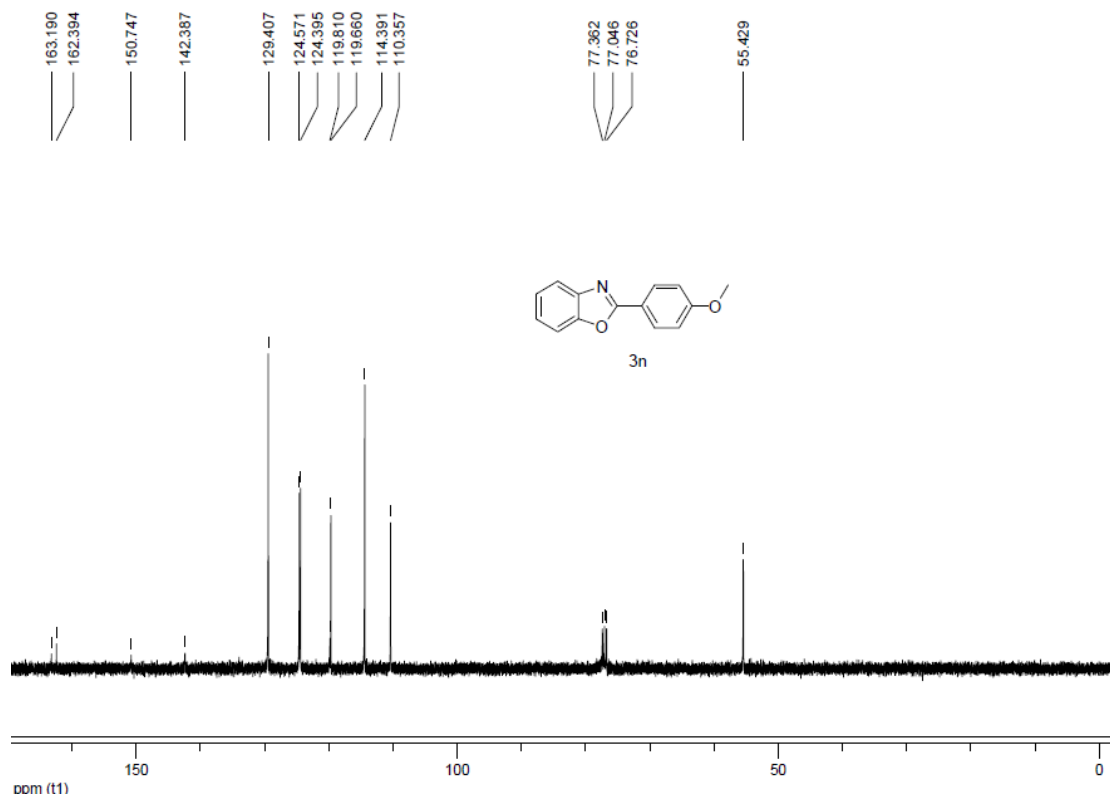

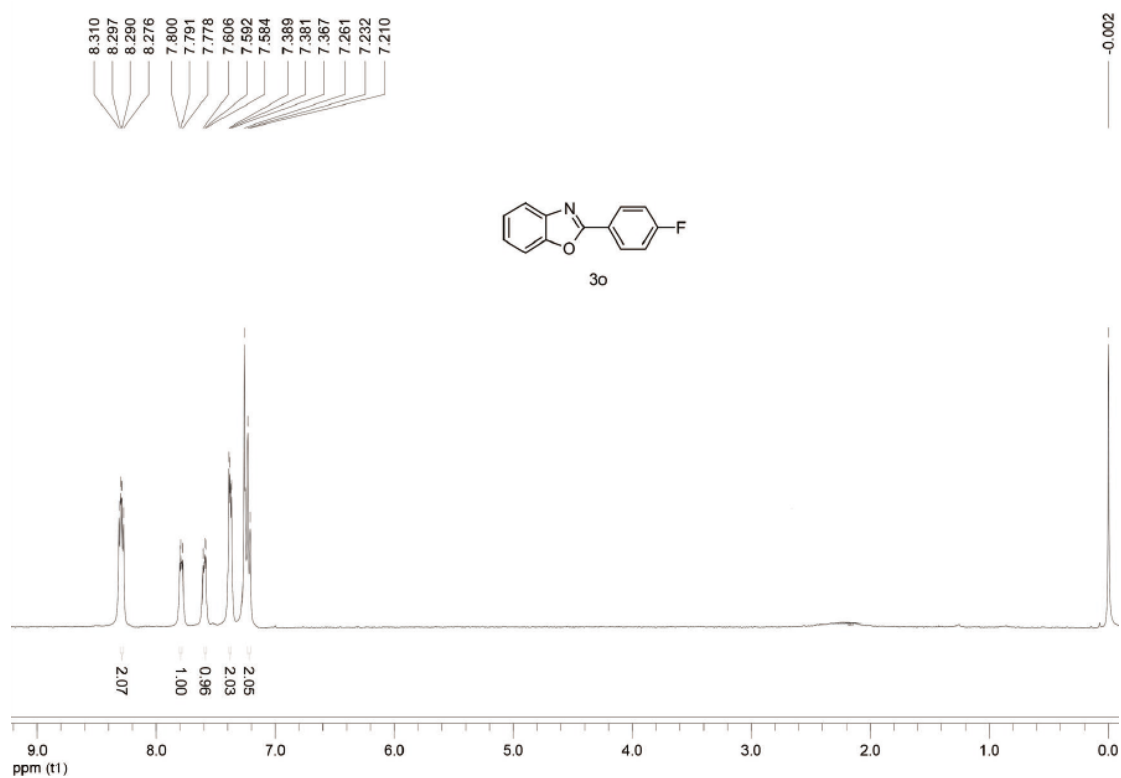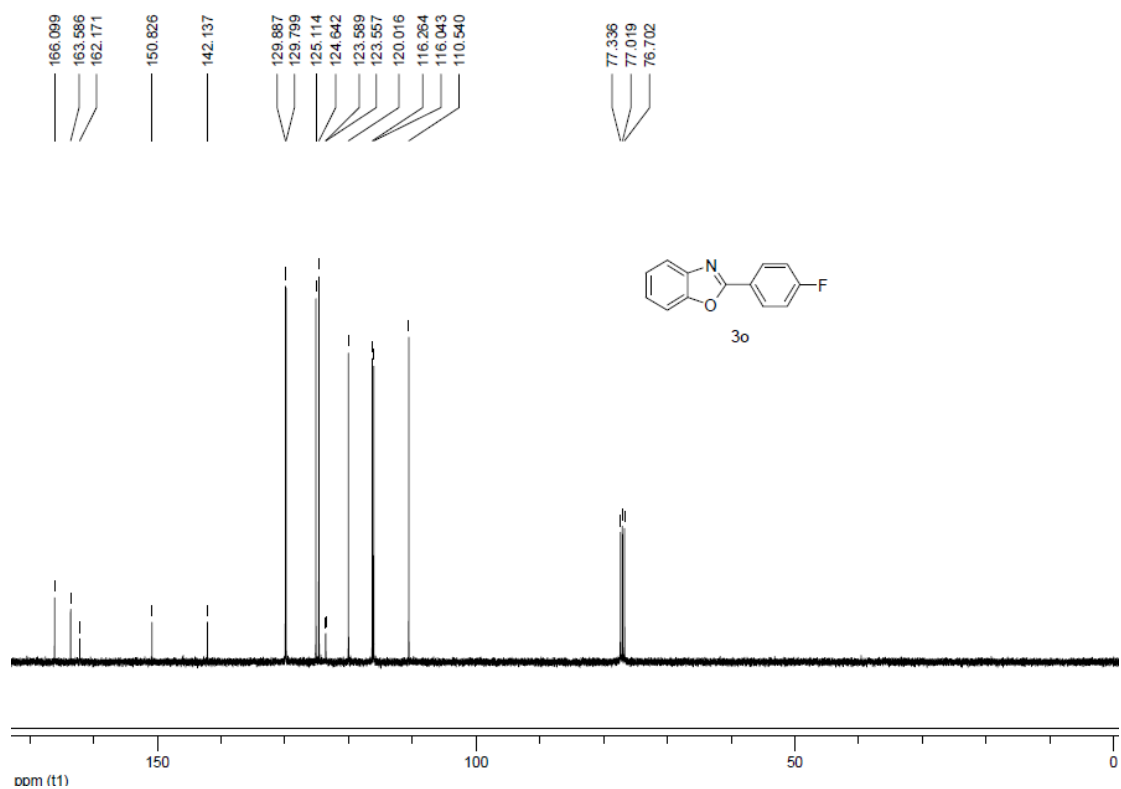



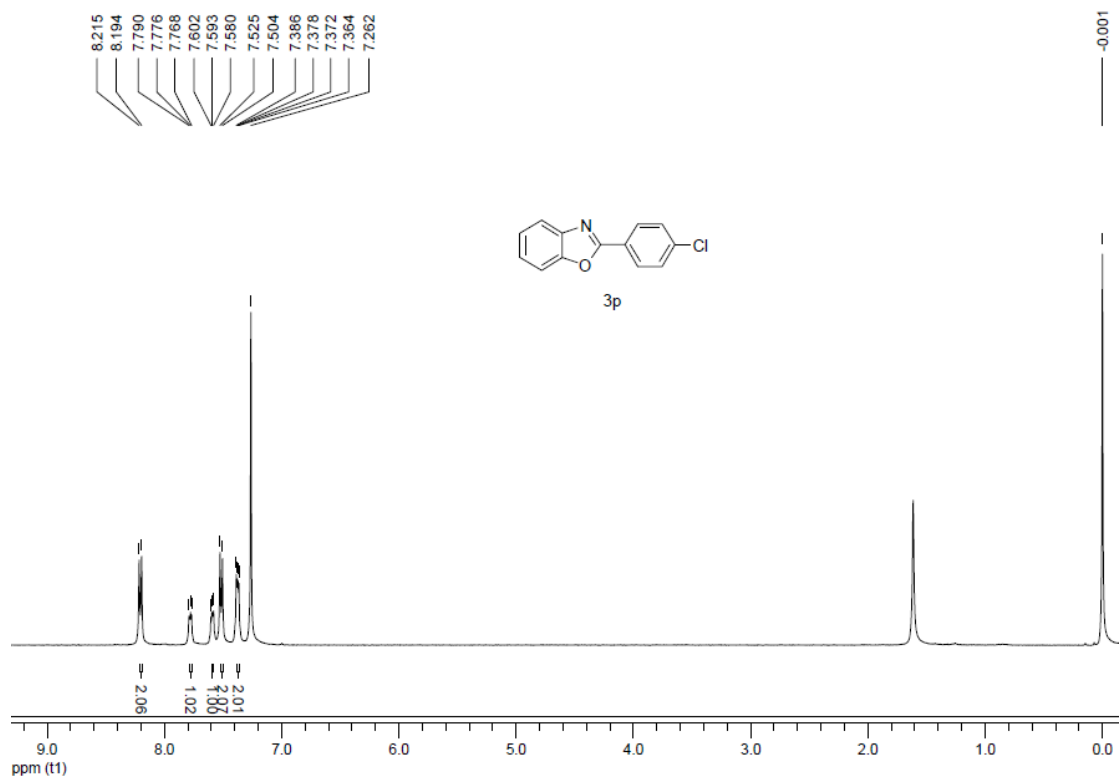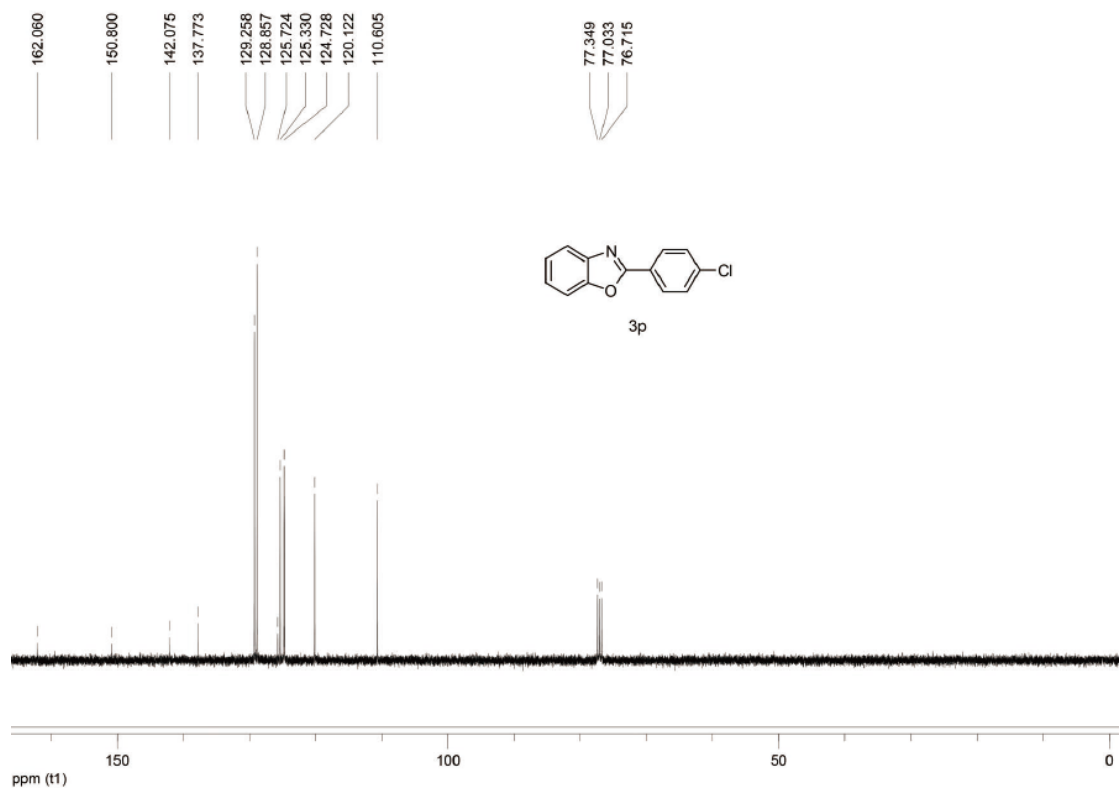

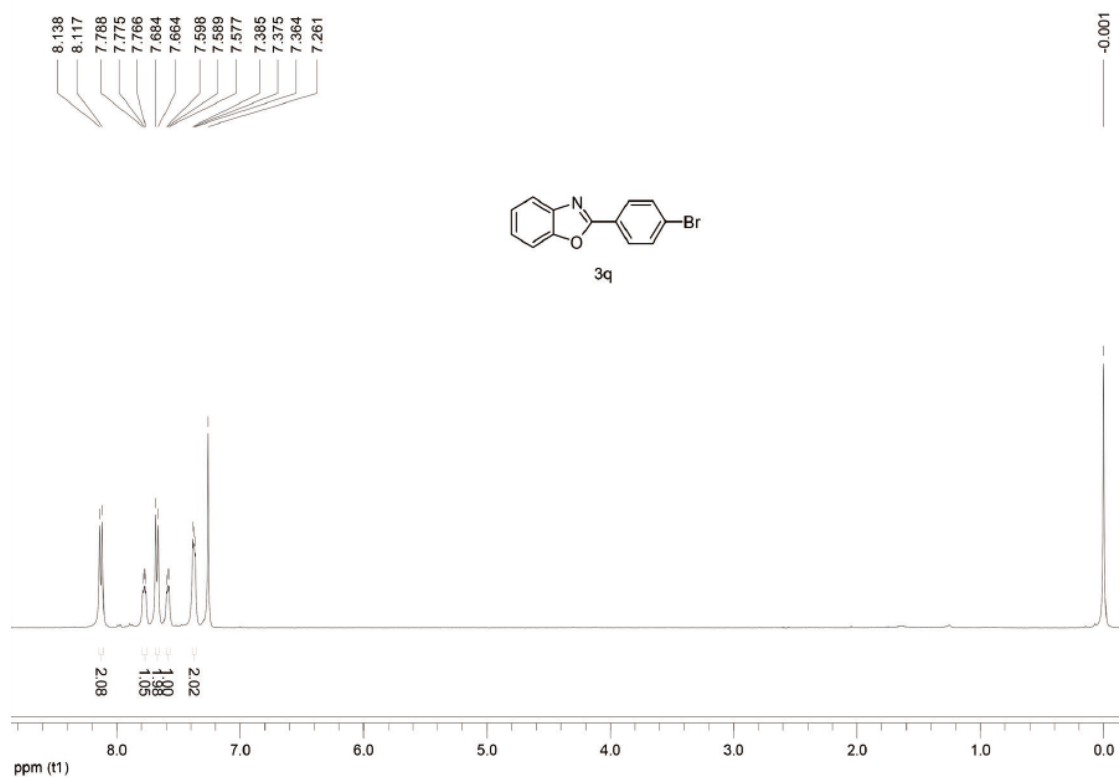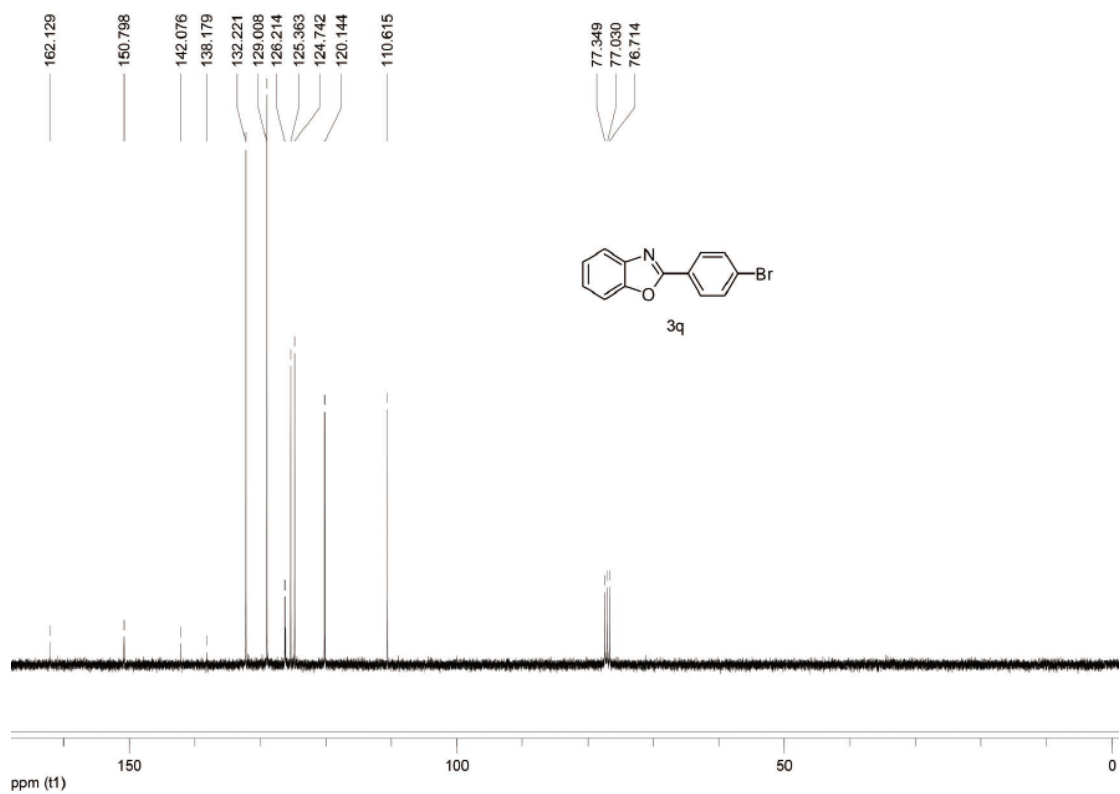

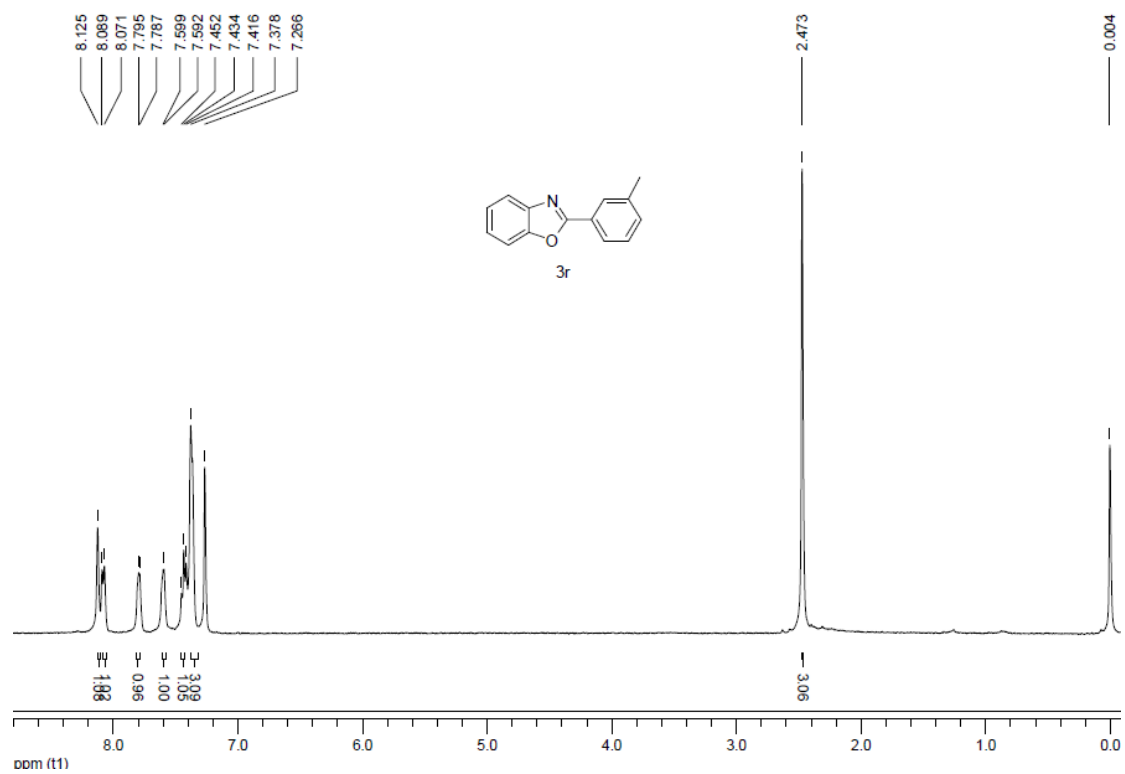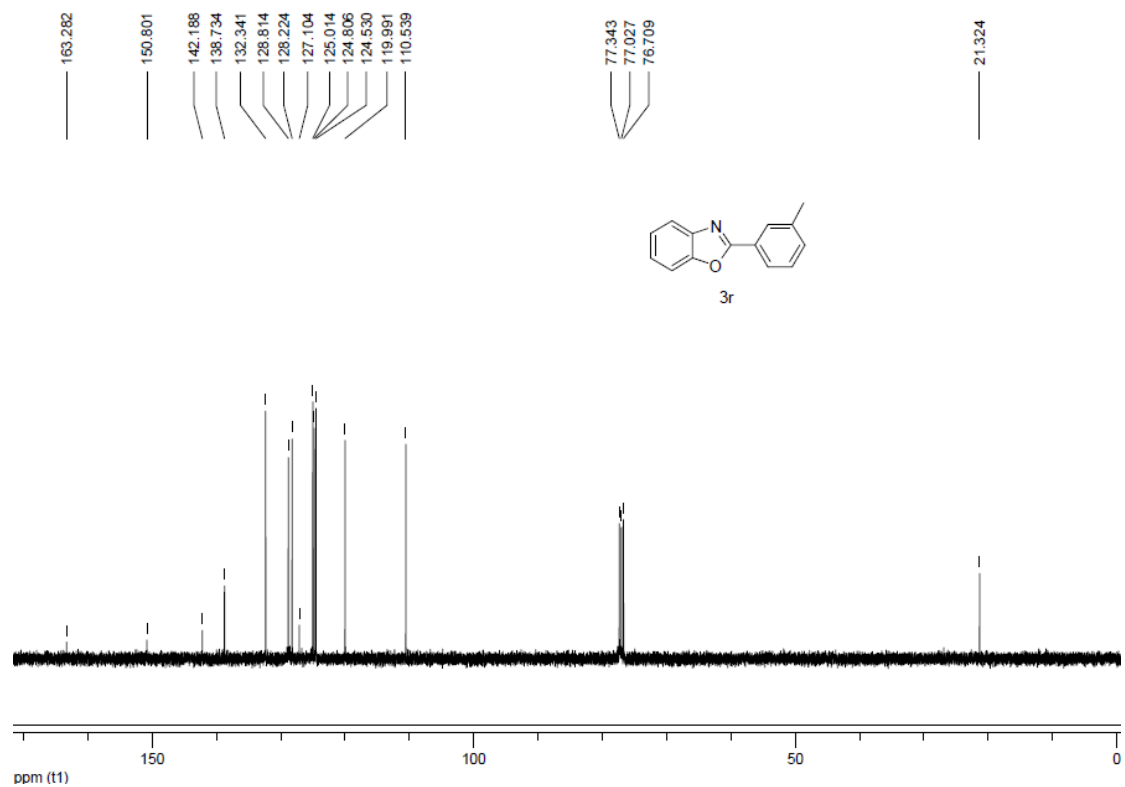

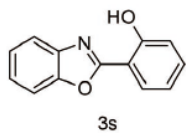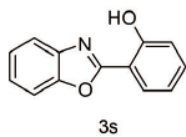

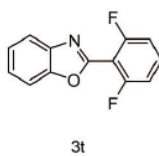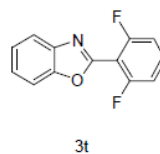

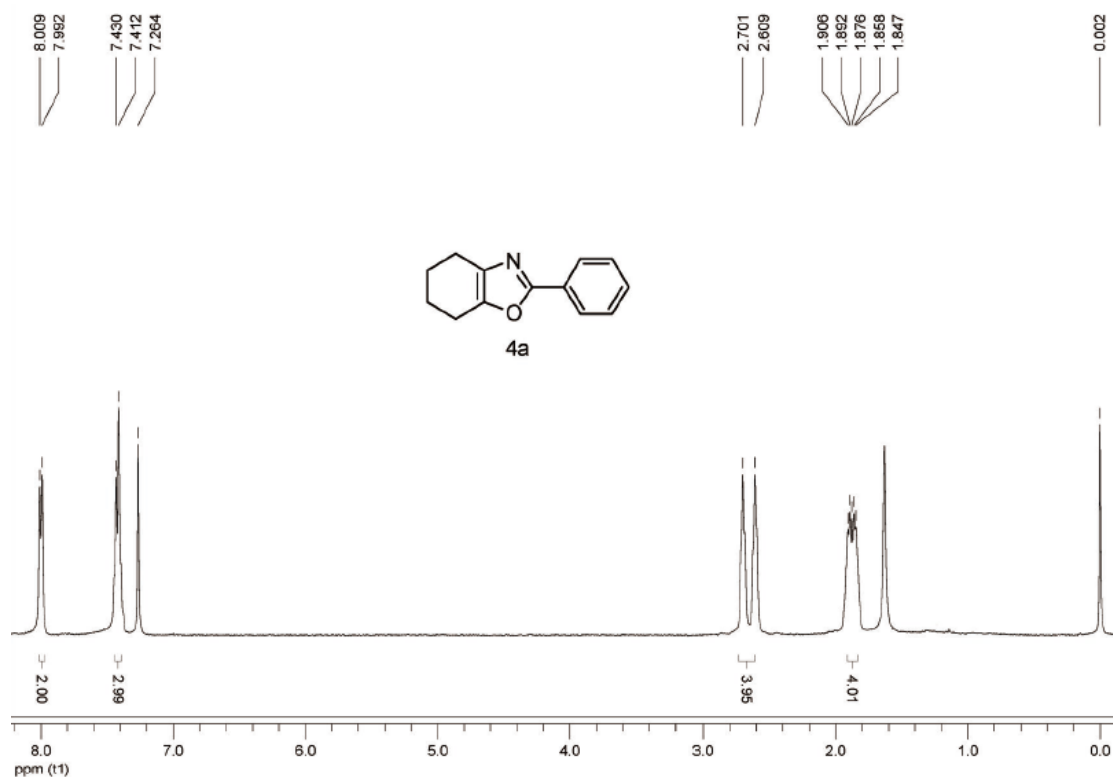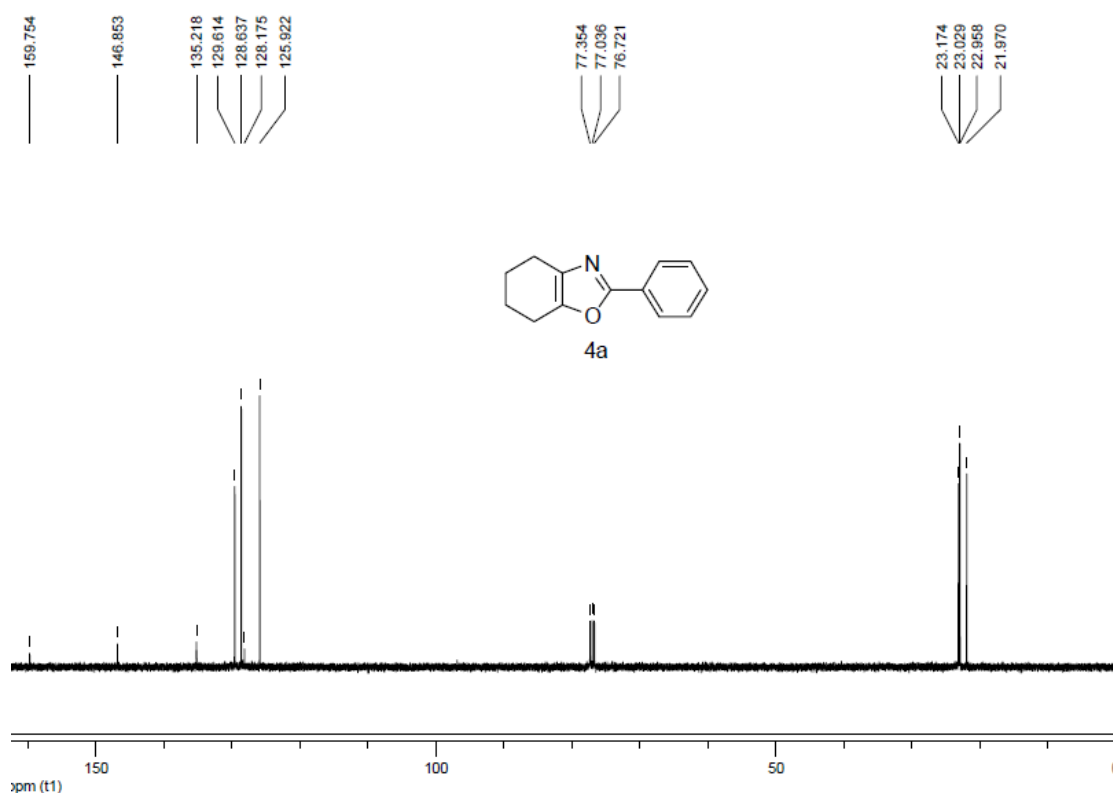

## HRMS (ESI) spectra of new products

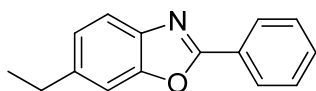

3c

1 #34-37 RT: 0.32-0.35 AV: 4 NL: 2.19E6  
T: FTMS (1,1) + p ESI Full ms [100.00-1000.00]

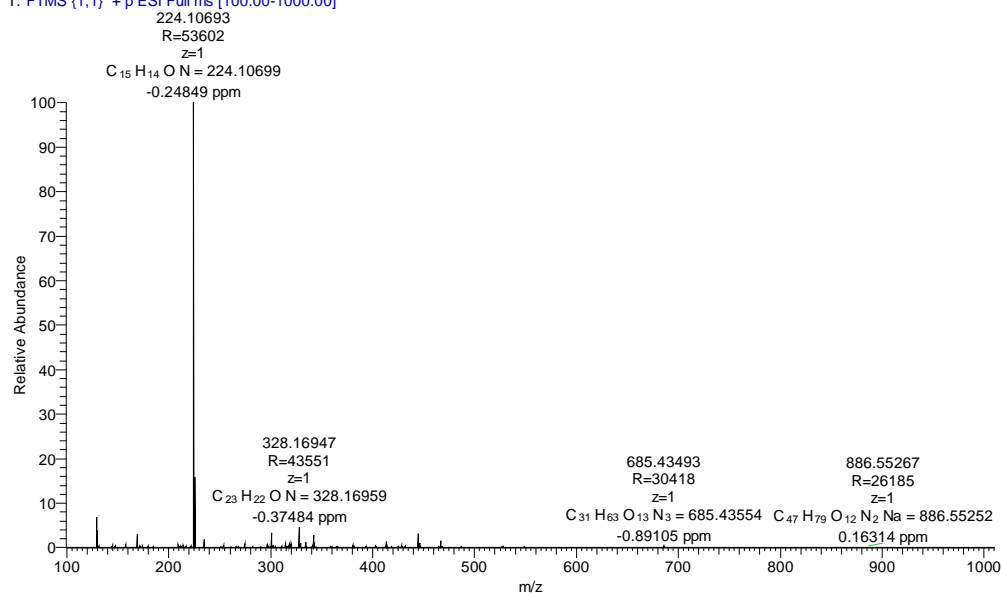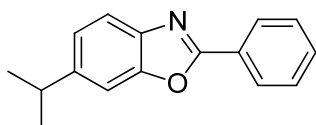

3d

4 #37-38 RT: 0.33-0.34 AV: 2 NL: 4.14E6  
T: FTMS (1,1) + p ESI Full ms [100.00-1000.00]

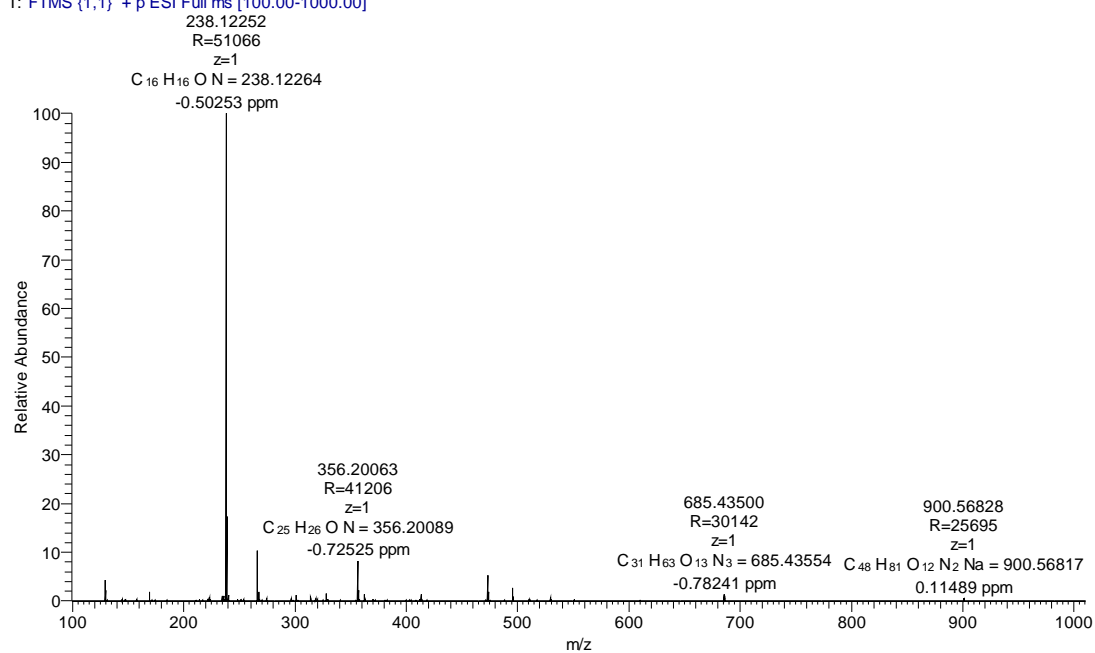

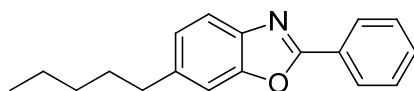

3e

2 #48 RT: 0.41 AV: 1 NL: 1.84E6  
T: FTMS (1,1) + p ESI Full ms [100.00-1000.00]

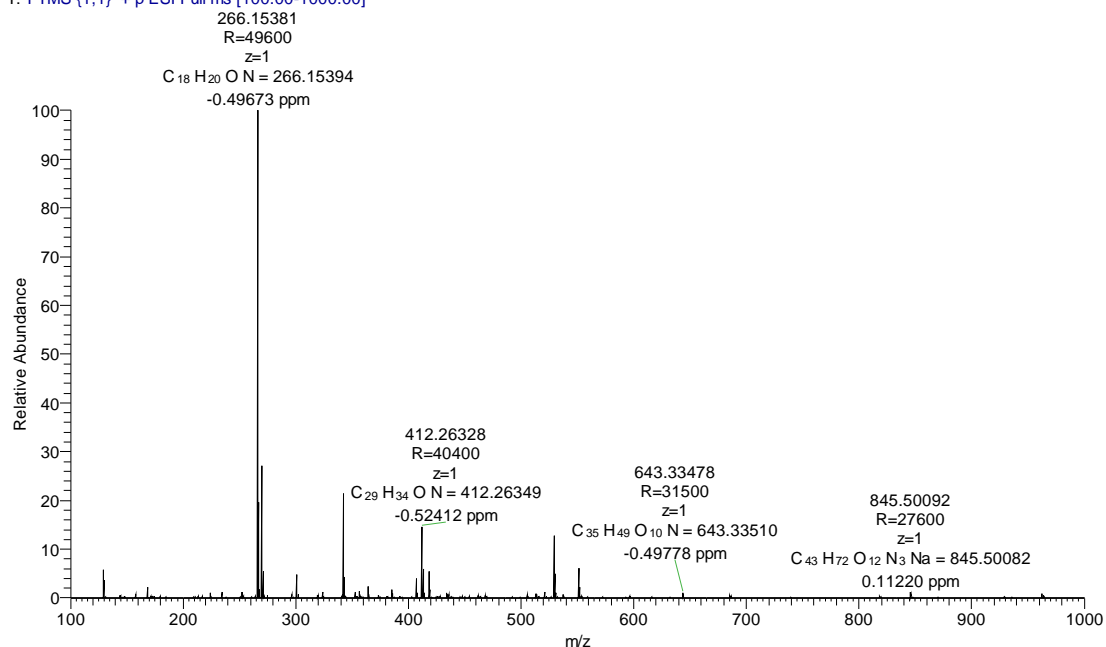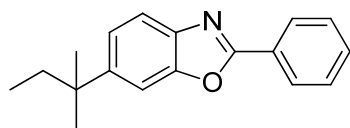

3f

3 #43-51 RT: 0.37-0.44 AV: 9 NL: 4.21E6  
T: FTMS (1,1) + p ESI Full ms [100.00-1000.00]

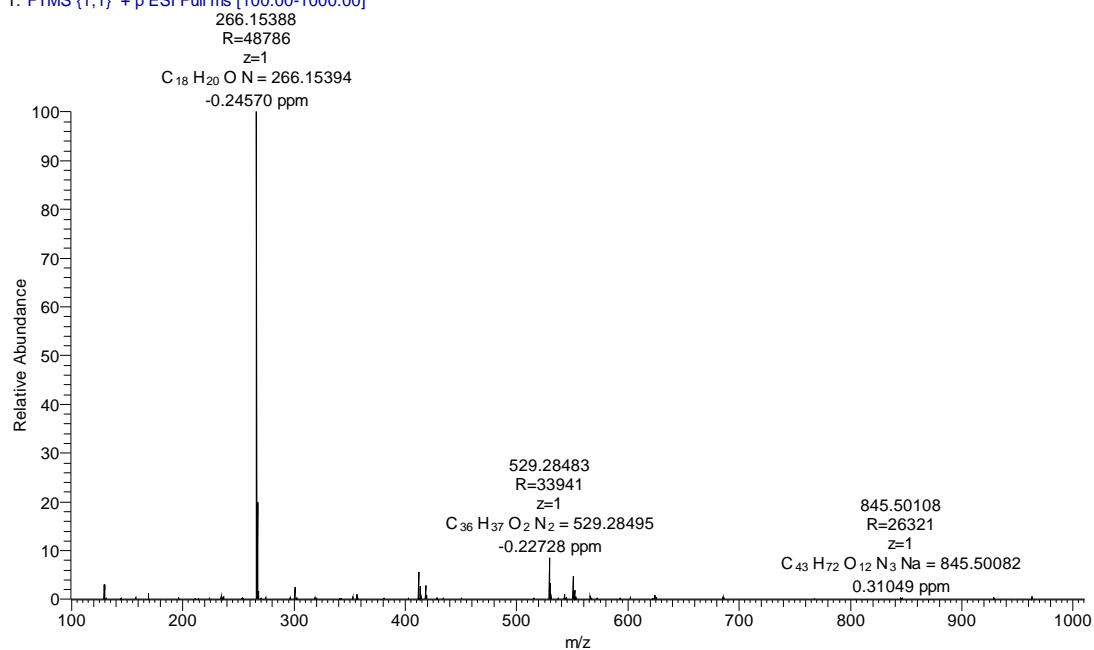



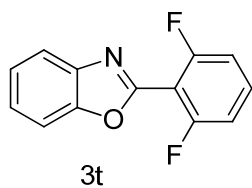

5 #34 RT: 0.31 AV: 1 NL: 5.38E6  
T: FTMS (1,1) + p ESI Full ms [100.00-1000.00]

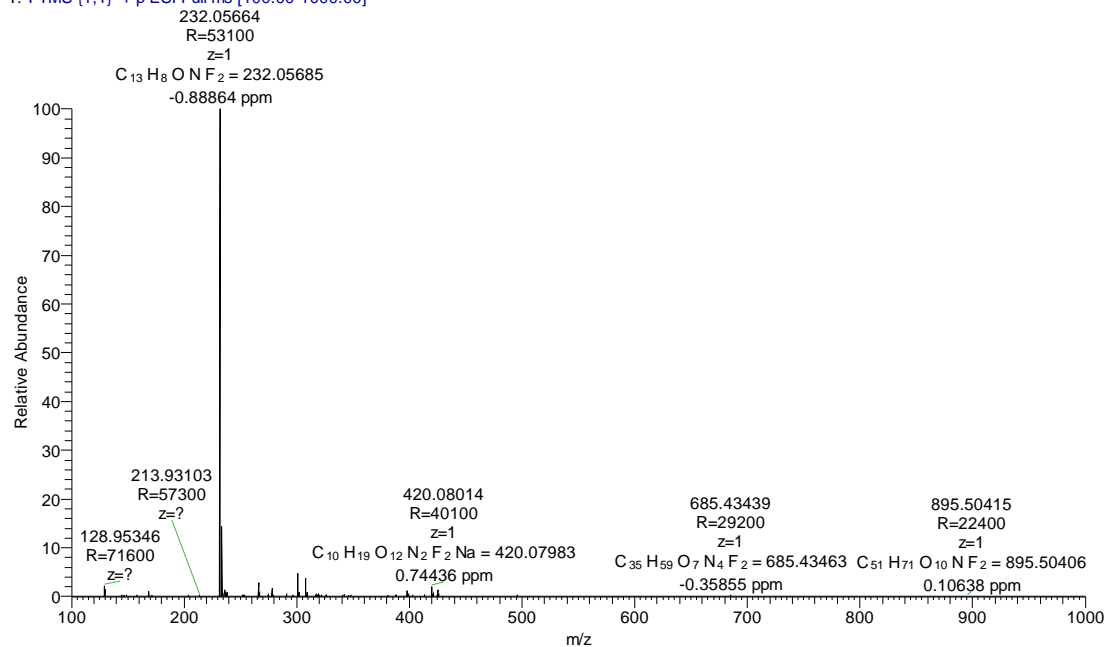

Supplement: c4gc01572j1.pdf [file c4gc01572j1.pdf]
